# Supplementary material
Source: PubMed Central journal article supplement (PMC3119959)
Supplement: ja2019367_si_001.pdf [file ja2019367_si_001.pdf]

## *Supporting Information*

# Temperature dependence of charge separation and recombination in porphyrin oligomer-fullerene donor-acceptor systems

*Axel Kahnt,<sup>□</sup> Joakim Kärnbratt,<sup>□</sup> Louisa J. Esdaile,<sup>§</sup> Marie Hutin,<sup>§</sup> Katsutoshi Sawada,<sup>§</sup>  
Harry Anderson,<sup>§\*</sup> Bo Albinsson<sup>□\*</sup>*

<sup>□</sup>Department of Chemical and Biological Engineering

Physical Chemistry, Kemivägen 3, 412 96 Göteborg (Sweden)

Fax: (+46) 31-772-3858

<sup>§</sup>Department of Chemistry, University of Oxford

Chemistry Research Laboratory, Mansfield Road

Oxford OX1 3TA (UK)

Fax: (+44) 1865-275-704

[balb@chalmers.se](mailto:balb@chalmers.se)

[harry.anderson@chem.ox.ac.uk](mailto:harry.anderson@chem.ox.ac.uk)

***Table of Contents:***

- S1) Synthetic Strategy and Schemes
- S2) Synthetic Procedures
- S3) NMR spectra
- S4) Mass spectra
- S5) HPLC Traces
- S6) UV/ vis absorption spectra of the oligoporphyrin-fullerene compounds at different temperatures
- S7) Fluorescence spectra of the oligoporphyrin-fullerene compounds at different temperatures
- S8) Fluorescence time profiles and table of the fitted lifetimes with the pre-exponential factors of the oligoporphyrin-fullerene compounds at different temperatures
- S9) Tables of the fitting parameters of the transient absorption decays of the oligoporphyrin-fullerene compounds at different temperatures

## Section S1: Synthetic Strategy and Schemes

The sarcosine derivative **S1** was designed to overcome solubility problems with the longer fullerene-terminated porphyrin oligomers. It was synthesized in three steps from 3,5-dihydroxybenzaldehyde, as shown in Scheme S1.1.

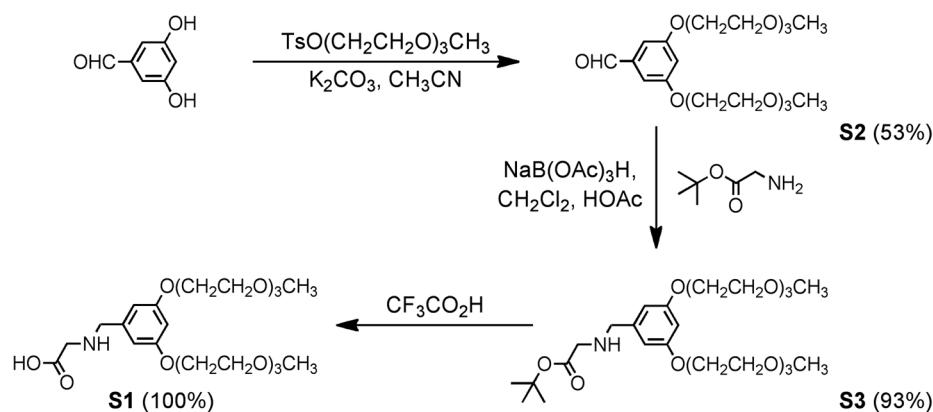

**Scheme S1.1.** The synthesis of sarcosine derivative **S1**.

The fullerene-terminated trimer and tetramer, **P<sub>3</sub>-C<sub>60</sub>** and **P<sub>4</sub>-C<sub>60</sub>**, were prepared using Prato coupling, as shown in Scheme S1.2. The hexamer derivative **P<sub>6</sub>-C<sub>60</sub>** was synthesized by the route shown in Scheme S1.3 which involves statistical cross-coupling of two trimers **P<sub>3</sub>-H** and **H-P<sub>3</sub>-CHO**.

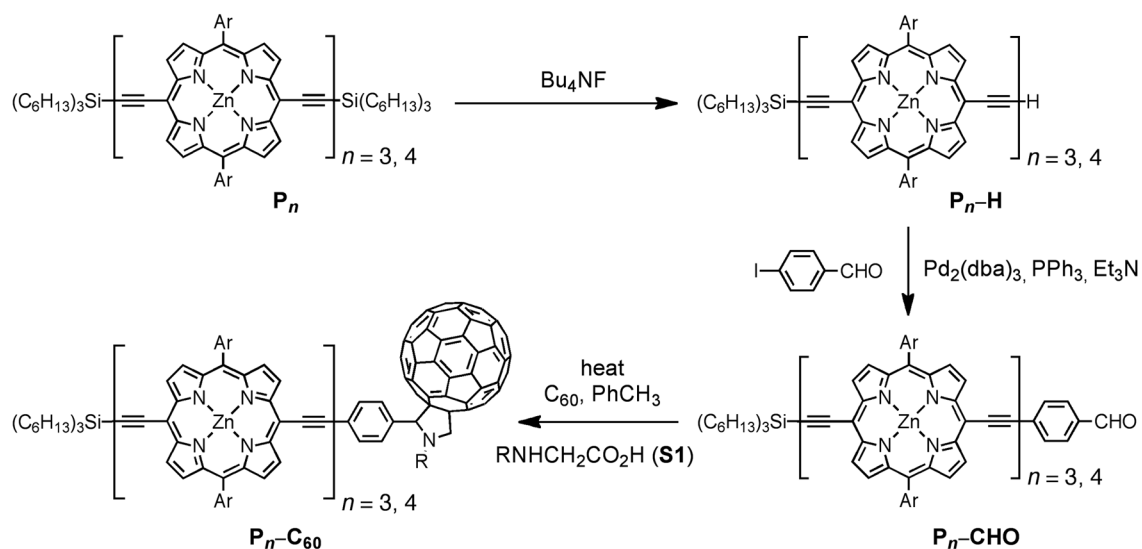

**Scheme S1.2.** The synthesis of fullerene-terminated porphyrin oligomers **P<sub>3</sub>-C<sub>60</sub>** and **P<sub>4</sub>-C<sub>60</sub>**.

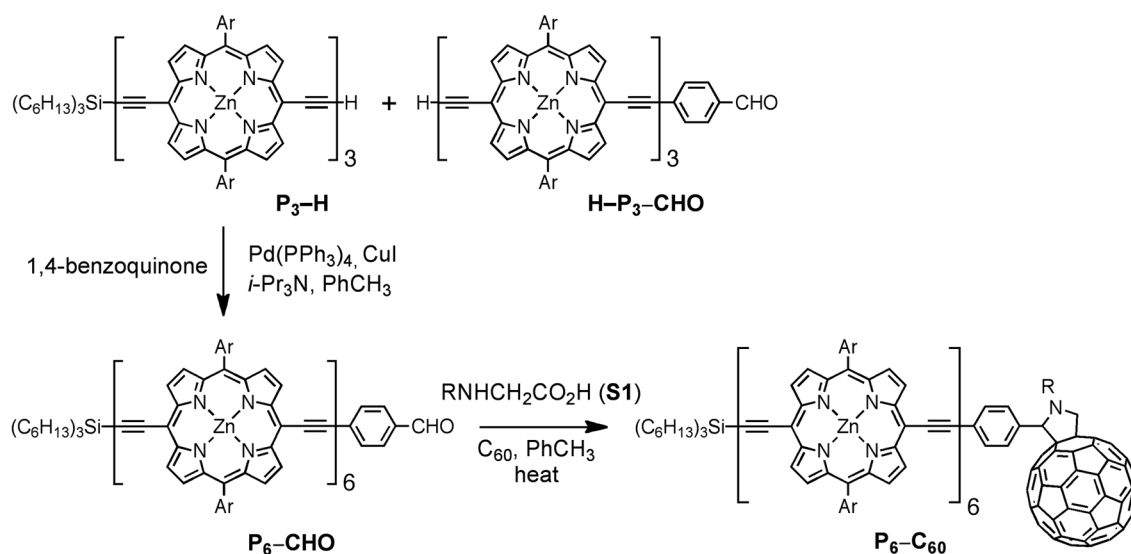

**Scheme S1.3.** The synthesis of hexamer **P<sub>6</sub>-C<sub>60</sub>**.

## Section S2: Synthetic Procedures

**Materials, Instrumentation and General Synthetic Procedures.** Solvents were dried by passing through alumina under N<sub>2</sub> pressure. Triethylamine was distilled from CaH<sub>2</sub>. Manipulation of all air and/or water sensitive compounds was carried out using standard high vacuum techniques. Porphyrin oligomers **P<sub>3</sub>**, **P<sub>4</sub>** and **P<sub>4</sub>-CHO** were synthesized using published procedures.<sup>1-2</sup> Column chromatography was carried out on Merck® silica gel 60 using a positive pressure of nitrogen. TLC was carried out on aluminum backed silica gel 60 F254 plates. Size exclusion chromatography was carried out using Bio-Beads S-X1, 200–400 mesh (Bio-Rad). Where mixtures of solvents were used, ratios reported are by volume. NMR spectra were recorded on a Bruker DPX-400 spectrometer, unless otherwise stated. Chemical shifts are quoted as parts per million (ppm) relative to tetramethylsilane and coupling constants (*J*) are quoted in Hertz (Hz). MALDI-TOF mass spectra were acquired by the EPSRC Mass Spectrometry Service, Swansea, UK, using a DCTB matrix. UV-visible spectra were recorded on a Perkin-Elmer Lambda 20 spectrometer. HPLC purification was performed using HPLC grade solvents with an ACE column (dimensions 250 × 10 mm, 100 Å pore size, 5 μm phase silica) on a VWR-Hitachi LaChrom Elite system, equipped with an L-2455 Diode Array Detector, L-2200 Autosampler, L-2350 Column Oven, L-2130 Pump and a Foxy Jr. Fraction Collector.

**Synthesis of 3,5-Bis(2-(2-(2-methoxyethoxy)ethoxy)ethoxy)benzaldehyde S2.** 3,5-Dihydroxybenzaldehyde (0.50 g, 3.6 mmol) and K<sub>2</sub>CO<sub>3</sub> (1.00 g, 7.7 mmol) were dried under

vacuum for 2 hr then acrylonitrile (3 cm<sup>3</sup>) and triethyleneglycol monotosylate (2.3 g, 7.2 mmol) were added, and the mixture was heated to reflux under nitrogen for 16 hr. The solvent was removed and the product was purified by silica gel column chromatography (EtOAc,  $R_f$  = 0.3) to yield **S2** (827 mg, 53%) as a colorless liquid. <sup>1</sup>H NMR (400 MHz CDCl<sub>3</sub>):  $\delta$  = 9.89 (s, 1H), 7.03 (d,  $J$  = 2.2, 2H), 6.77 (t,  $J$  = 2.3, 1H), 4.18 (t,  $J$  = 4.4, 4H), 3.89 (t,  $J$  = 5.0, 4H), 3.75–3.55 (m, 16H), 3.39 (s, 6H) (This compound has been prepared previously using similar procedures).<sup>3-5</sup>

**Synthesis of Aryl-sarcosine *tert*-Butyl ester **S3**.** 3,5-Bis(2-(2-(2-methoxyethoxy)ethoxy)ethoxy)benzaldehyde **S2** (650 mg, 1.51 mmol) was dissolved in CH<sub>2</sub>Cl<sub>2</sub> (64 cm<sup>3</sup>) under argon and acetic acid

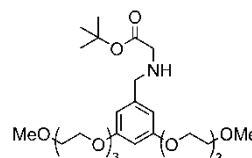

was added (1.28 cm<sup>3</sup>). Glycine *tert*-butyl ester (2 eq., 413  $\mu$ l, 3.02 mmol) was added, the mixture was stirred for 20 min, sodium triacetoxyborohydride (2.5 eq., 801 mg, 3.78 mmol) was then added and the mixture was stirred for a further 1 hr. A saturated aqueous solution of sodium carbonate (25 cm<sup>3</sup>) was then added, the product extracted in to CH<sub>2</sub>Cl<sub>2</sub> (3  $\times$  20 cm<sup>3</sup>), the organic layer washed with brine (25 cm<sup>3</sup>), dried (MgSO<sub>4</sub>), filtered and the solvent removed to give **S3** as a pale yellow oil (765 mg, 93 %). <sup>1</sup>H NMR (400 MHz CDCl<sub>3</sub>):  $\delta$  = 6.50 (d,  $J$  = 2.2, 2H, ArH), 6.40 (t,  $J$  = 2.2, 1H, ArH), 4.10 (t,  $J$  = 4.7, 4H, OCH<sub>2</sub>), 3.86–3.83 (m, 4H, OCH<sub>2</sub>), 3.76–3.72 (m, 6H, 4 OCH<sub>2</sub>, 2 CH<sub>2</sub>) 3.70–3.65 (m, 8H, OCH<sub>2</sub>), 3.58–3.55 (m, 4H, OCH<sub>2</sub>), 3.39 (s, 6H, OCH<sub>3</sub>), 3.28 (s, 2H, CH<sub>2</sub>), 1.47 (s, 9H, OCH<sub>3</sub>);  $m/z$  (ESI) 546.3 [(M + 1)<sup>+</sup> C<sub>27</sub>H<sub>48</sub>NO<sub>10</sub> calc. 546.3], 489.3 [(M - *t*Bu)<sup>+</sup> C<sub>23</sub>H<sub>39</sub>NO<sub>10</sub> calc. 489.3].

**Synthesis of Aryl-sarcosine **S1**.** Aryl-sarcosine *tert*-butyl ester **S3** (202 mg, 0.307 mmol) was dissolved in trifluoroacetic acid (11 eq., 0.409 mmol, 2.75 cm<sup>3</sup>) and the solution was stirred for 1 hr. The solvent was

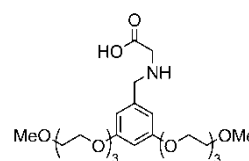

removed, the product dissolved in water (2 cm<sup>3</sup>) and neutralized with sodium hydroxide solution (1.0 M) to pH 7 and the solvent removed. The resulting residue was dissolved in CH<sub>2</sub>Cl<sub>2</sub> (20 cm<sup>3</sup>), filtered and the solvent removed and the resulting pale yellow oil (245 mg, quant.) was dried under vacuum. <sup>1</sup>H NMR (400 MHz CDCl<sub>3</sub>):  $\delta$  = 6.61 (d,  $J$  = 2.0, 2H, ArH), 6.44 (t,  $J$  = 2.0, 1H, ArH), 4.07–4.04 (m, 4H, OCH<sub>2</sub>), 3.93 (br, 2H, CH<sub>2</sub>), 3.81–3.78 (m, 4H, OCH<sub>2</sub>), 3.71–3.68 (m, 4H, OCH<sub>2</sub>) 3.66–3.60 (m, 8H, OCH<sub>2</sub>), 3.53–3.50 (m, 4H, OCH<sub>2</sub>), 3.37 (br, 2H, CH<sub>2</sub>), 3.31 (s, 6H, OCH<sub>3</sub>);  $m/z$  (ESI) 490.3 [(M + 1)<sup>+</sup> C<sub>23</sub>H<sub>40</sub>NO<sub>10</sub> calc. 490.3], 512.2 [(M + Na)<sup>+</sup> C<sub>23</sub>H<sub>39</sub>NNaO<sub>10</sub> calc. 512.2].

**Synthesis of P<sub>3</sub>-CHO.** The protected porphyrin trimer **P<sub>3</sub>** (50.9 mg, 0.0132 mmol) was dissolved in dry CH<sub>2</sub>Cl<sub>2</sub> (1.6 cm<sup>3</sup>) and CHCl<sub>3</sub> (1.6 cm<sup>3</sup>).

TBAF solution (1.0 M in THF, 1.5 eq., 0.027 mmol, 27 μl) was added and the mixture was stirred under argon for 23 min, monitored by TLC [40–60 petroleum ether/pyridine (85:15)]. Acetic acid (50 μl, 0.87 mmol)

was added, the mixture was passed through a short column of silica (CH<sub>2</sub>Cl<sub>2</sub>) and the solvent was removed. This mixture was used immediately in the next step without further purification. Deprotected trimer mixture (0.0132 mmol), *para*-iodobenzaldehyde (10 eq., 0.133 mmol, 30.9 mg), Pd<sub>2</sub>(dba)<sub>3</sub> (10 mol%, 0.0013 mmol, 1.2 mg) and PPh<sub>3</sub> (40 mol%, 0.0053 mmol, 1.4 mg) were dried under vacuum for 40 min, and the vessel was purged with argon. Triethylamine (4.3 cm<sup>3</sup>) was added, the mixture was treated to three freeze-pump-thaw cycles and then heated to 50 °C under argon for 14 hr. The mixture was passed through a short column of silica (CH<sub>2</sub>Cl<sub>2</sub>), the solvent removed and the residue was separated using column chromatography with 40–60 petroleum ether/pyridine (85:15) as eluent. The first eluting band was unreacted **P<sub>3</sub>**, followed by the desired product **P<sub>3</sub>-CHO**. The product was purified by recrystallization from CH<sub>2</sub>Cl<sub>2</sub>/MeOH to give a dark brown powder (17.6 mg, 36 % over 2 steps).

<sup>1</sup>H NMR (400 MHz CDCl<sub>3</sub> / 1 % C<sub>5</sub>D<sub>5</sub>N): δ = 10.15 (s, 1H, CHO<sub>a</sub>), 9.89–9.86 (m, 8H, βH<sub>b2-5</sub>), 9.70 (d, *J* = 4.4, 2H, βH<sub>b1</sub>), 9.64 (d, *J* = 4.6, 2H, βH<sub>b6</sub>), 9.08–9.06 (m, 8H, βH<sub>c2-5</sub>), 9.03 (d, *J* = 4.4, 2H, βH<sub>c1</sub>), 8.97 (d, *J* = 4.6, 2H, βH<sub>c6</sub>), 8.18 (d, *J* = 8.0, 2H, ArH<sub>d</sub>), 8.09 (d, *J* = 8.0, 2H, ArH<sub>e</sub>), 7.42 (d, *J* = 2.2, 4H, ArH<sub>f2</sub>), 7.39 (d, *J* = 2.0, 4H, ArH<sub>f1</sub>), 7.38 (d, *J* = 2.2, 4H, ArH<sub>f3</sub>), 6.93–6.91 (m, 6H, ArH<sub>g</sub>), 4.19–4.16 (m, 24H, octyl-CH<sub>2h</sub>), 1.95–1.89 (m, 24H, octyl-CH<sub>2h</sub>), 1.83–1.75 (m, 6H, hexyl-CH<sub>2i</sub>), 1.59–1.52 (m, 36 H, 12 hexyl-CH<sub>2i</sub>, 24 octyl-CH<sub>2h</sub>), 1.42–1.28 (m, 102H, 6 hexyl-CH<sub>2i</sub>, 96 octyl-CH<sub>2h</sub>), 1.06–1.02 (m, 6H, hexyl-CH<sub>2i</sub>), 0.95–0.86 (m, 45H, 9 hexyl-CH<sub>3i</sub>, 36 octyl-CH<sub>3h</sub>); *m/z* (MALDI) 3643.0 (M<sup>+</sup>, C<sub>229</sub>H<sub>290</sub>N<sub>12</sub>O<sub>13</sub>SiZn<sub>3</sub> calc. 3643.0); UV/vis (CHCl<sub>3</sub>/pyridine 99:1): λ<sub>max</sub>/nm (ε/10<sup>3</sup> M<sup>-1</sup> cm<sup>-1</sup>) 468 (523), 500 (227), 590 (29.0), 699 (sh 93.4), 759 (181); UV/vis (THF): λ<sub>max</sub>/nm (ε/10<sup>3</sup> M<sup>-1</sup> cm<sup>-1</sup>) 464 (556), 496 (237), 585 (32.1), 697 (sh 111), 743 (175); UV/vis (THF/pyridine 99:1): λ<sub>max</sub>/nm (ε/10<sup>3</sup> M<sup>-1</sup> cm<sup>-1</sup>) 466 (567), 497 (224), 589 (30.5), 698 (sh 106), 749 (174).

**Synthesis of P<sub>3</sub>-C<sub>60</sub>.** C<sub>60</sub> (10 eq., 0.0274 mmol, 19.7 mg) was sonicated in dry toluene (6.7 cm<sup>3</sup>) for 1 hr and this solution was added to vacuum-dried **P<sub>3</sub>-CHO** (10.0 mg, 0.00274 mmol) and

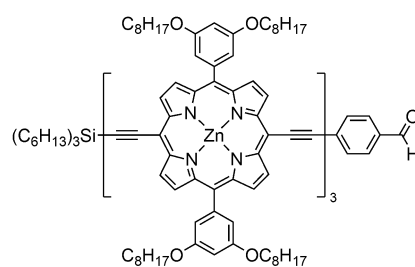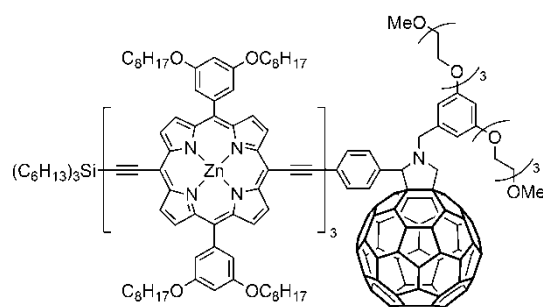

aryl-sarcosine **S1** (20 eq., 0.0549 mmol, 26.9 mg). The mixture was degassed and refluxed under argon for 13 hr, then allowed to cool, purified on silica (toluene, then CH<sub>2</sub>Cl<sub>2</sub>, then CH<sub>2</sub>Cl<sub>2</sub>/MeOH 1 %) and recrystallized from CH<sub>2</sub>Cl<sub>2</sub>/MeOH to give **P<sub>3</sub>-C<sub>60</sub>** as a dark brown powder (10.6 mg, 81 %). <sup>1</sup>H NMR (400 MHz CDCl<sub>3</sub> / 1 % C<sub>5</sub>D<sub>5</sub>N): δ = 9.88–9.86 (m, 8H, βH<sub>a2-5</sub>), 9.71 (d, *J* = 4.4, 2H, βH<sub>a1</sub>), 9.64 (d, *J* = 4.4, 2H, βH<sub>a2</sub>), 9.07–9.05 (m, 8H, βH<sub>b2-5</sub>), 8.98 (d, *J* = 4.6, 2H, βH<sub>b1</sub>), 8.97 (d, *J* = 4.6, 2H, βH<sub>b6</sub>), 8.12 (br, 4H, ArH<sub>c</sub>), 7.41 (d, *J* = 2.0, 4H, ArH<sub>d2</sub>), 7.39 (m, 8H, ArH<sub>d1,3</sub>), 6.94–6.91 (m, 8H, 6 ArH<sub>e</sub>, 2 ArH<sub>f</sub>), 6.58–6.57 (m, 1H, ArH<sub>g</sub>), 5.29 (br, 1H, CH<sub>h</sub>), 4.94–4.91 (m, 1H, CH<sub>2i</sub>), 4.65–4.60 (br, 1H, CH<sub>2j</sub>), 4.26–4.24 (m, 4H, OCH<sub>2k</sub>), 4.20–4.16 (m, 25H, 24 octyl-CH<sub>2l</sub>, 1 CH<sub>2i</sub>), 3.95–3.93 (m, 4H, OCH<sub>2k</sub>), 3.80–3.78 (m, 4H, OCH<sub>2k</sub>), 3.73–3.71 (m, 4H, OCH<sub>2k</sub>), 3.68–3.66 (m, 5H, 4 OCH<sub>2k</sub>, 1 CH<sub>2j</sub>), 3.57–3.55 (m, 4H, OCH<sub>2k</sub>), 3.38 (s, 6H, OCH<sub>3m</sub>), 1.93–1.75 (m, 36H, 24 octyl-CH<sub>2l</sub>, 6 hexyl-CH<sub>2n</sub>), 1.58–1.51 (m, 36H, 12 hexyl-CH<sub>2n</sub>, 24 octyl-CH<sub>2l</sub>), 1.41–1.26 (m, 102H, 6 hexyl-CH<sub>2n</sub>, 96 octyl-CH<sub>2l</sub>), 1.06–1.00 (m, 6H, hexyl-CH<sub>2n</sub>), 0.93–0.85 (m, 45H, 9 hexyl-CH<sub>3n</sub>, 36 octyl-CH<sub>3l</sub>); *m/z* (MALDI) 3791.3 (M<sup>+</sup>, C<sub>311</sub>H<sub>327</sub>N<sub>13</sub>O<sub>20</sub>SiZn<sub>3</sub> calc. 3791.3); UV/vis (CHCl<sub>3</sub>/pyridine 99:1): λ<sub>max</sub>/nm (ε/10<sup>3</sup> M<sup>-1</sup> cm<sup>-1</sup>) 466 (505), 500 (215), 590 (29.6), 699 (sh 88.4), 759 (172); UV/vis (THF): λ<sub>max</sub>/nm (ε/10<sup>3</sup> M<sup>-1</sup> cm<sup>-1</sup>) 462 (535), 496 (228), 586 (31.3), 688 (sh 101), 743 (167); UV/vis (THF/pyridine 99:1): λ<sub>max</sub>/nm (ε/10<sup>3</sup> M<sup>-1</sup> cm<sup>-1</sup>) 465 (554), 498 (218), 587 (30.7), 698 (sh 103), 749 (168). Nierengarten and co-workers studied the restricted rotation of aryl-substituted fullerene derivatives.<sup>6</sup> Our spectral assignment around the C<sub>60</sub> group is in agreement with that reported.

**Synthesis of P<sub>4</sub>-C<sub>60</sub>.** C<sub>60</sub> (0.0226 mmol, 16.3 mg) was sonicated in dry toluene (10 cm<sup>3</sup>) for 1 hr and this solution was added to vacuum-dried P<sub>4</sub>-CHO (21.4 mg, 0.00453 mmol) and aryl-sarcosine S1 (0.0453 mmol, 22.2 mg). The mixture was degassed and refluxed under nitrogen overnight.

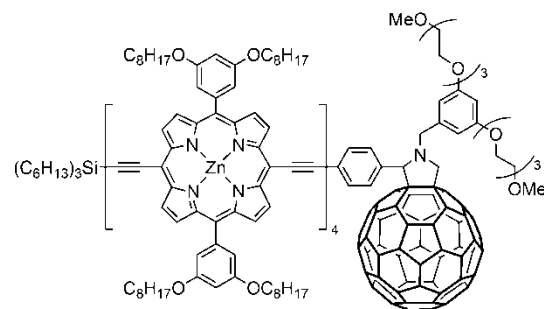

The mixture was allowed to cool, purified on silica (toluene, then CH<sub>2</sub>Cl<sub>2</sub>, then CH<sub>2</sub>Cl<sub>2</sub>/MeOH 1 %) and then recrystallized from CH<sub>2</sub>Cl<sub>2</sub>/MeOH to give P<sub>4</sub>-C<sub>60</sub> as a dark brown powder (25.2 mg, 94 %). <sup>1</sup>H NMR (250 MHz CDCl<sub>3</sub> / 1 % C<sub>5</sub>D<sub>5</sub>N, 298K): δ = 9.86–9.89 (m, 12H, βH<sub>a2-7</sub>), 9.70 (d, *J* = 4.5, 2H, βH<sub>a1</sub>), 9.64 (d, *J* = 4.5, 2H, βH<sub>a8</sub>), 9.08–9.04 (m, 12H, βH<sub>b2-7</sub>), 8.97 (d, *J* = 4.5, 2H, βH<sub>b1</sub>), 8.96 (d, *J* = 4.5, 2H, βH<sub>b8</sub>), 8.12 (br, 4H, ArH<sub>c</sub>), 7.41 (d, *J* = 2, 8H, ArH<sub>d2-3</sub>), 7.37 (m, 8H, ArH<sub>d1,4</sub>), 6.94–6.91 (m, 10H, 8 ArH<sub>e</sub>, 2 ArH<sub>f</sub>), 6.67 (br, 1H, ArH<sub>g</sub>), 5.13 (br, 1H, CH<sub>h</sub>), 4.92 (br, 1H, CH<sub>2i</sub>), 4.60 (br, 1H, CH<sub>2j</sub>), 4.21–4.14 (m, 37H, 4 CH<sub>2k</sub>, 32 octyl-CH<sub>2l</sub>, 1 CH<sub>2i</sub>), 3.96–3.92 (m, 4H, OCH<sub>2k</sub>), 3.81–3.77 (m, 4H, OCH<sub>2k</sub>), 3.74–3.71 (m, 4H, OCH<sub>2k</sub>), 3.68–3.64 (m, 5H, 4 OCH<sub>2k</sub>, 1 CH<sub>2j</sub>), 3.57–3.53 (m, 4H, OCH<sub>2k</sub>), 3.37 (s, 6H, OCH<sub>3m</sub>), 1.93–1.84 (m, 32H, octyl-CH<sub>2l</sub>), 1.80–1.72 (m, 6H, hexyl-CH<sub>2n</sub>), 1.59–1.48 (m, 44H, 12 hexyl-CH<sub>2n</sub>, 32 octyl-CH<sub>2l</sub>), 1.42–1.25 (m, 150H, 6 hexyl-CH<sub>2n</sub>, 144 octyl-CH<sub>2l</sub>), 1.06–0.99 (m, 6H, hexyl-CH<sub>2n</sub>), 0.93–0.83 (m, 63H, 9 hexyl-CH<sub>3n</sub>, 54 octyl-CH<sub>3l</sub>); *m/z* (MALDI + NaOAc) 5877.4 (M<sup>+</sup>, C<sub>379</sub>H<sub>409</sub>N<sub>17</sub>O<sub>24</sub>SiZn<sub>4</sub> calc. 5876.05), 5211.3 ([M – C<sub>60</sub> + AcO]<sup>+</sup>, calc. 5216.8; UV/vis (CHCl<sub>3</sub>/pyridine 99:1): λ<sub>max</sub>/nm (ε/10<sup>3</sup> M<sup>-1</sup> cm<sup>-1</sup>) 467 (511), 769 (210).

**Synthesis of P<sub>6</sub>-C<sub>60</sub>.** The protected porphyrin trimer P<sub>3</sub> (49.6 mg, 0.0130 mmol) was dissolved in dry CH<sub>2</sub>Cl<sub>2</sub> (1.6 cm<sup>3</sup>) and CHCl<sub>3</sub> (1.6 cm<sup>3</sup>) and mixture was placed under argon. TBAF solution (1.0 M in THF, 2 eq., 0.026 mmol, 26 μl) was added and the mixture was stirred under

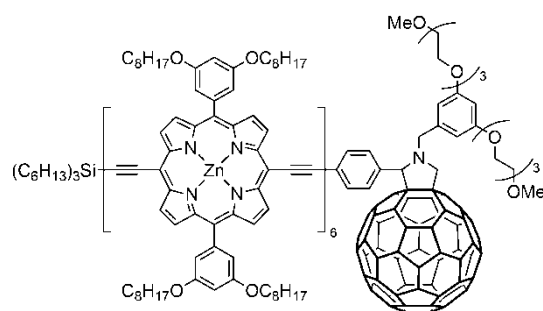

argon for 35 min, monitored by TLC (40–60 petroleum ether/pyridine/THF 85:10:5). The mixture was passed through a short column of silica (CH<sub>2</sub>Cl<sub>2</sub>) and the solvent was removed. The residue was separated using column chromatography with 40–60 petroleum ether/pyridine (85:15) as eluent. The first eluting band was unreacted P<sub>3</sub> (29.2 mg, 59 %), followed by the desired intermediate P<sub>3</sub>-H (14.1 mg, 31 %).

P<sub>3</sub>-CHO (14.5 mg, 0.00398 mmol) was dissolved in CH<sub>2</sub>Cl<sub>2</sub> (2 cm<sup>3</sup>) under argon, TBAF solution (1.0 M in THF, 10 eq., 0.0398 mmol, 40 μl) was added and the mixture was stirred at



room temperature for 30 min. Mixture was passed through a short column of silica (CH<sub>2</sub>Cl<sub>2</sub>/pyridine 99:1) to give the desired **H-P<sub>3</sub>-CHO**, and this product was used immediately in the next step without further purification.

**P<sub>3</sub>-H** (14.1 mg, 0.00398 mmol), **H-P<sub>3</sub>-CHO** (0.00398 mmol), Pd(PPh<sub>3</sub>)<sub>4</sub> (5 mol%, 0.000398 mmol, 0.46 mg), CuI (50 mol%, 0.00398 mmol, 0.76 mg) and 1,4-benzoquinone (2 eq., 0.0159 mmol, 1.7 mg) were dried for 25 min, the vessel was purged with argon. Diisopropylamine (0.77 cm<sup>3</sup>) and toluene (2.0 cm<sup>3</sup>) were added and the mixture was heated to 50 °C for 15 hr. The statistical mixture was passed through a short silica column (CH<sub>2</sub>Cl<sub>2</sub>/pyridine 99:1), and purified by size exclusion chromatography (toluene with 0.02 % pyridine). C<sub>60</sub> (10 eq., 0.0332 mmol, 23.9 mg) was sonicated in dry toluene (11 cm<sup>3</sup>) and pyridine (1%, 110 μl) for 30 min and this solution was added to vacuum-dried hexamer mixture (22.9 mg, 0.00332 mmol) and aryl-sarcosine **S1** (20 eq., 0.0664 mmol, 32.5 mg). The mixture was degassed, refluxed under argon for 15 hr and allowed to cool. The mixture was purified using a silica chromatography (toluene/pyridine 99:1, then toluene/THF/pyridine 97:2:1, then toluene/THF/pyridine 89:10:1). The first eluting band was **P<sub>6</sub>**, followed by the desired product **P<sub>6</sub>-C<sub>60</sub>**. This fraction was purified using semi-preparative HPLC, and the product was then recrystallized from CH<sub>2</sub>Cl<sub>2</sub>/MeOH to give a dark brown powder (**P<sub>6</sub>-C<sub>60</sub>**, 4.1 mg, 15 %, from 3 steps). <sup>1</sup>H NMR (400 MHz CDCl<sub>3</sub> / 1 % C<sub>5</sub>D<sub>5</sub>N): δ = 9.90–9.87 (m, 20H, βH<sub>a2-11</sub>), 9.71 (d, *J* = 4.4, 2H, βH<sub>a1</sub>), 9.64 (d, *J* = 4.5, 2H, βH<sub>a12</sub>), 9.09–9.07 (m, 20H, βH<sub>b2-11</sub>), 8.98 (d, *J* = 4.4, 2H, βH<sub>b1</sub>), 8.96 (d, *J* = 4.5, 2H, βH<sub>b12</sub>), 8.13 (br, 4H, ArH<sub>c</sub>), 7.44–7.42 (m, 16H, ArH<sub>d2-5</sub>), 7.39–7.37 (m, 8H, ArH<sub>d1,6</sub>), 6.95–6.91 (m, 14H, 12 ArH<sub>e</sub>, 2 ArH<sub>f</sub>), 6.58–6.57 (m, 1H, ArH<sub>g</sub>), 5.28 (br, 1H, CH<sub>h</sub>), 4.92–4.89 (m, 1H, CH<sub>2i</sub>), 4.65–4.60 (br, 1H, CH<sub>2j</sub>), 4.32–4.08 (m, 53H, 4 OCH<sub>2k</sub>, 48 octyl-CH<sub>2l</sub>, 1 CH<sub>2i</sub>), 3.94–3.91 (m, 4H, OCH<sub>2k</sub>), 3.79–3.76 (m, 4H, OCH<sub>2k</sub>), 3.73–3.70 (m, 4H, OCH<sub>2k</sub>), 3.68–3.65 (m, 5H, 4 OCH<sub>2k</sub>, 1 CH<sub>2j</sub>), 3.57–3.54 (m, 4H, OCH<sub>2k</sub>), 3.37 (s, 6H, OCH<sub>3m</sub>), 1.94–1.75 (m, 54H, 48 octyl-CH<sub>2l</sub>, 6 hexyl-CH<sub>2n</sub>), 1.59–1.50 (m, 60H, 12 hexyl-CH<sub>2n</sub>, 48 octyl-CH<sub>2l</sub>), 1.44–1.25 (m, 198H, 6 hexyl-CH<sub>2n</sub>, 192 octyl-CH<sub>2l</sub>), 1.05–1.00 (m, 6H, hexyl-CH<sub>2n</sub>), 0.94–0.84 (m, 81H, 9 hexyl-CH<sub>3n</sub>, 72 octyl-CH<sub>3l</sub>); UV/vis (CHCl<sub>3</sub>/pyridine 99:1): λ<sub>max</sub>/nm (ε/10<sup>3</sup> M<sup>-1</sup> cm<sup>-1</sup>) 468 (666), 500 (sh 445), 592 (48.8), 795 (299); UV/vis (THF): λ<sub>max</sub>/nm (ε/10<sup>3</sup> M<sup>-1</sup> cm<sup>-1</sup>) 465 (724), 495 (466), 587 (52.1), 766 (305); UV/vis (CHCl<sub>3</sub>/pyridine 99:1): λ<sub>max</sub>/nm (ε/10<sup>3</sup> M<sup>-1</sup> cm<sup>-1</sup>) 466 (737), 497 (sh 450), 589 (50.7), 776 (307).

Section S3: NMR Spectra

**P<sub>3</sub>-CHO**; <sup>1</sup>H NMR (400 MHz, CDCl<sub>3</sub>/1 % C<sub>5</sub>H<sub>5</sub>N)

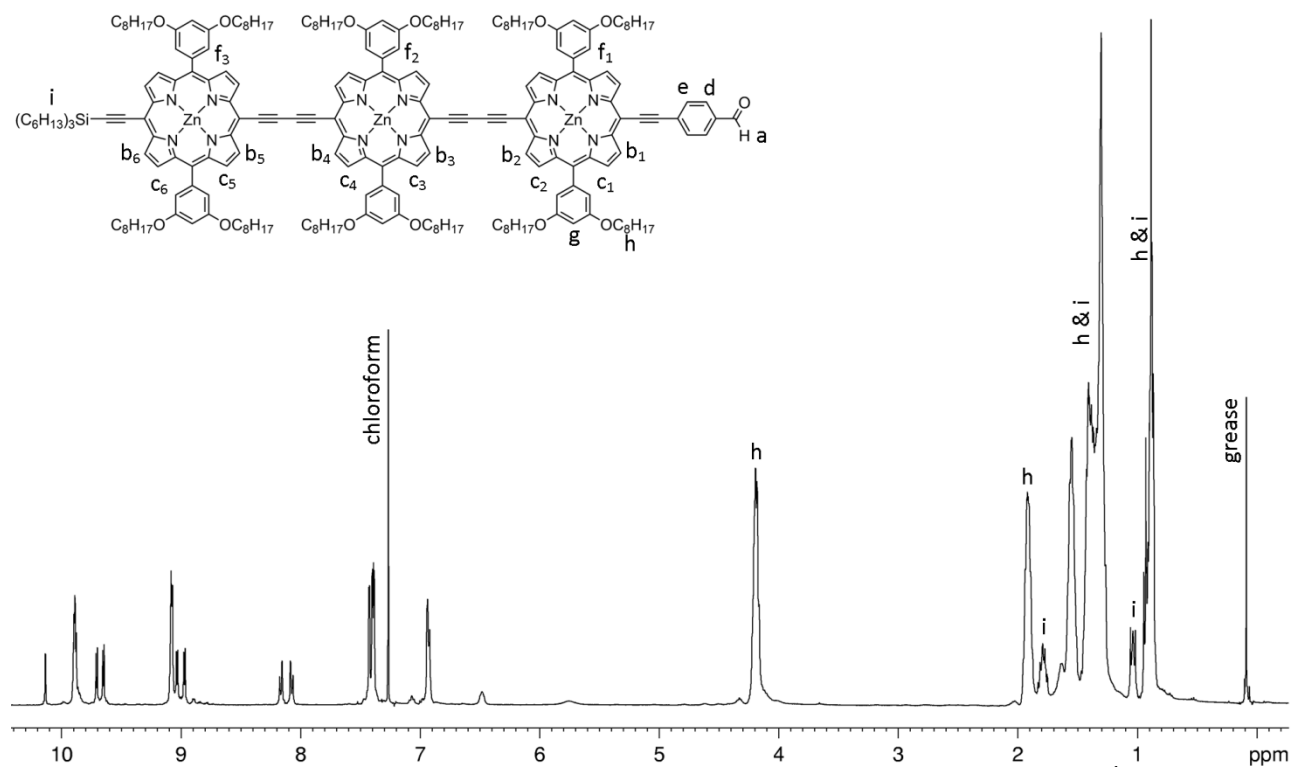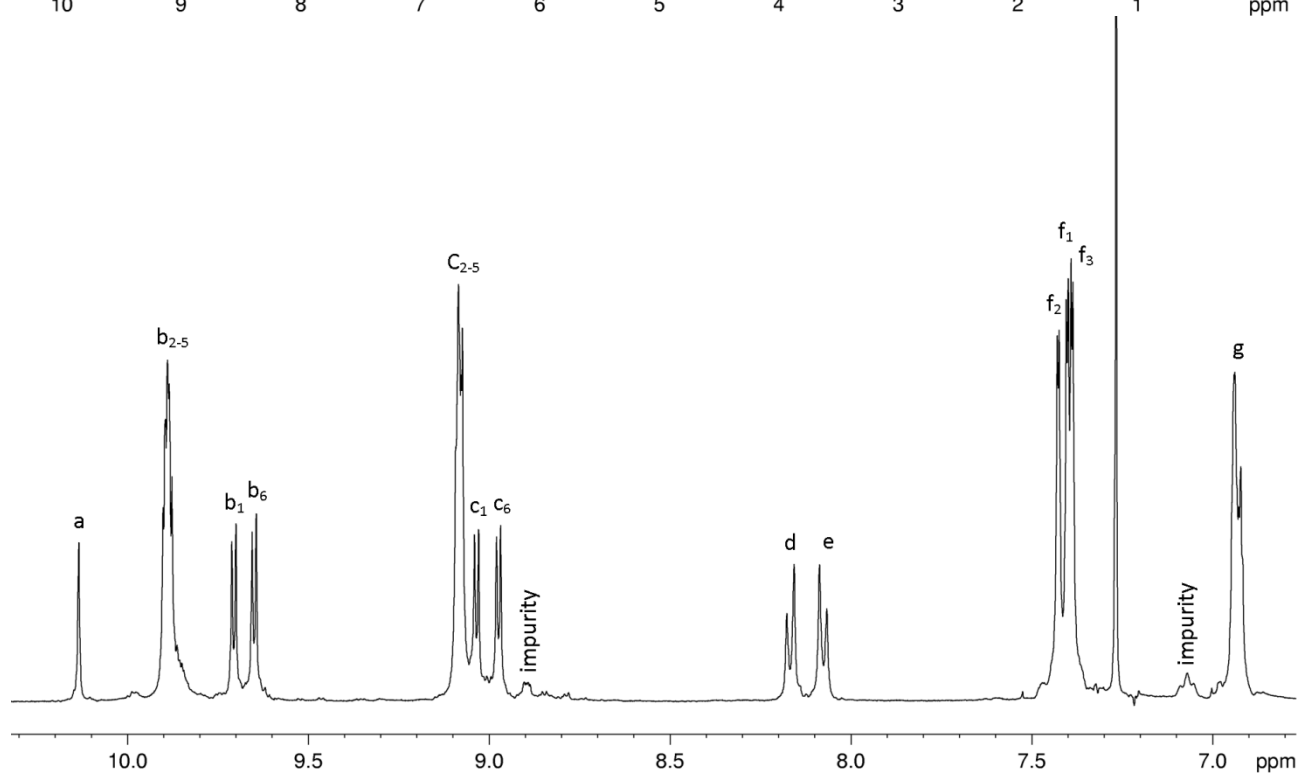

**P<sub>3</sub>-C<sub>60</sub>**; <sup>1</sup>H NMR (400 MHz, CDCl<sub>3</sub>/1 % C<sub>5</sub>H<sub>5</sub>N)

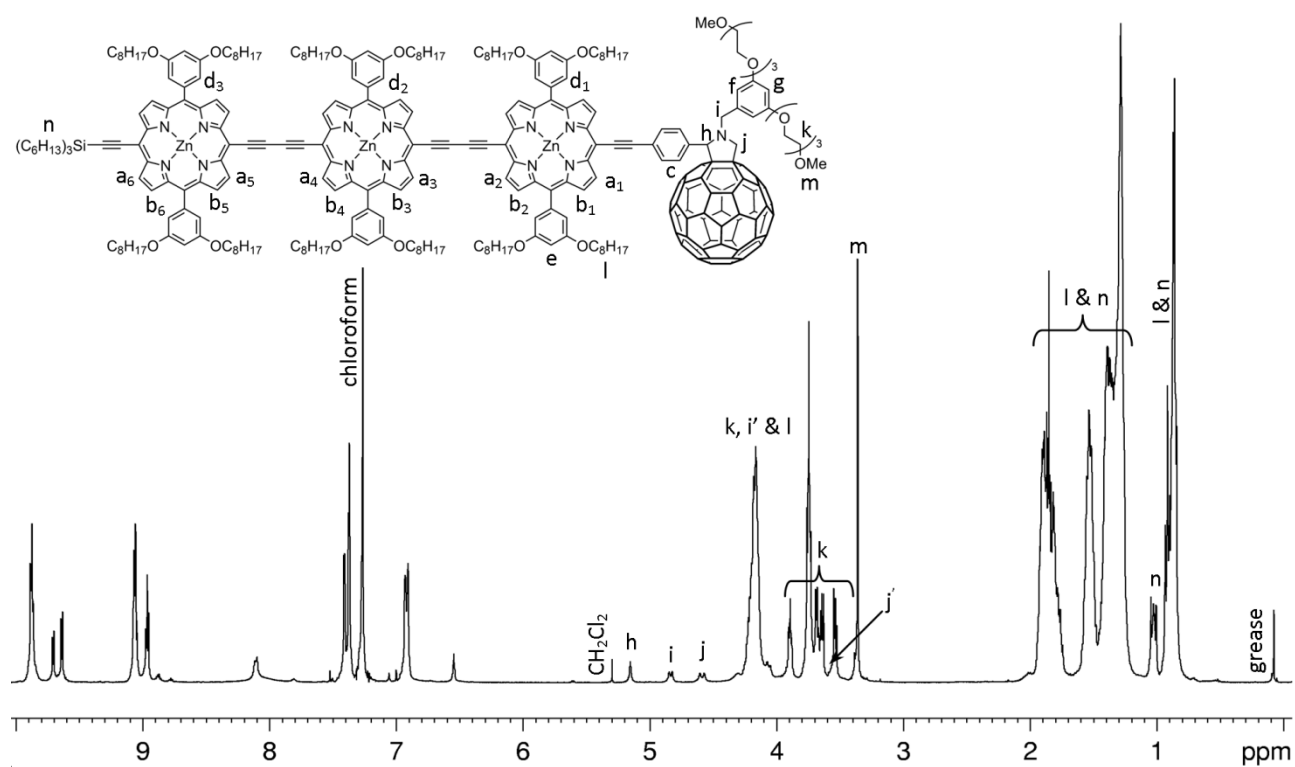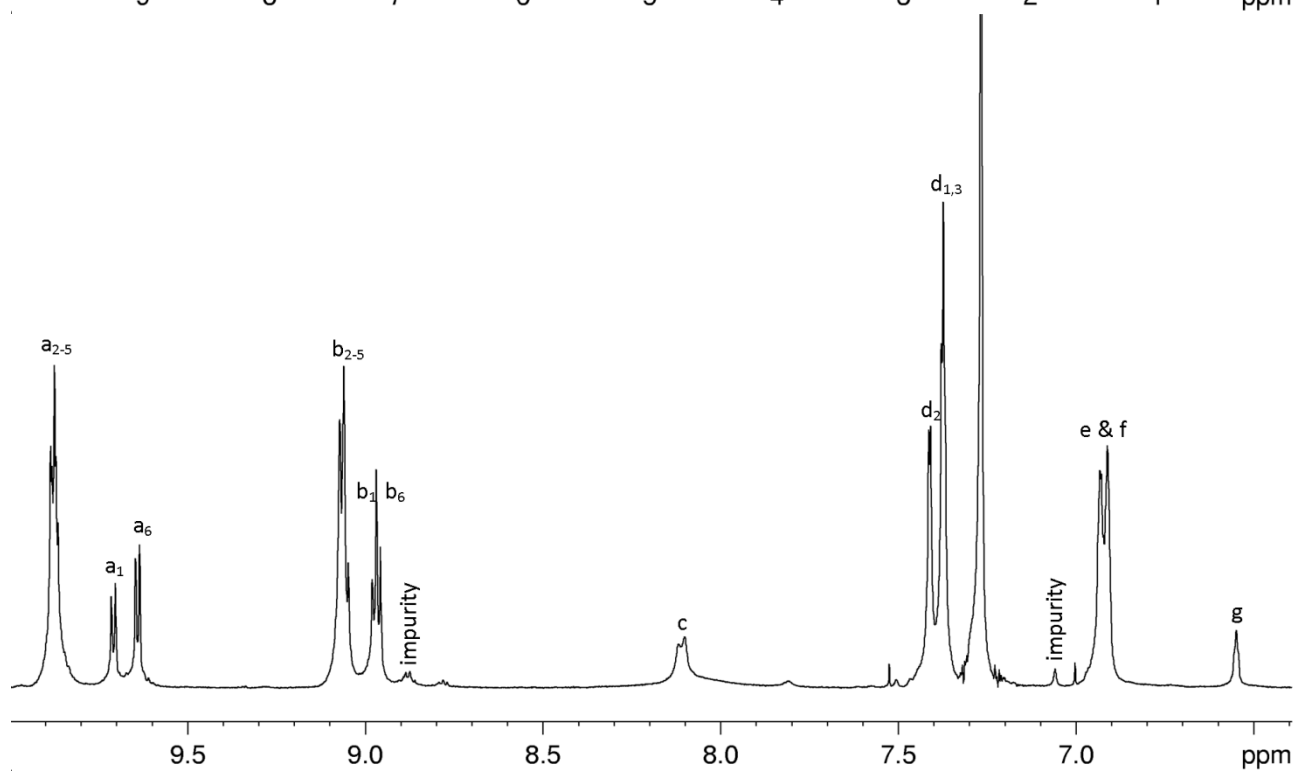

**P<sub>4</sub>-C<sub>60</sub>**; <sup>1</sup>H NMR (250 MHz, CDCl<sub>3</sub>/1 % C<sub>5</sub>H<sub>5</sub>N)

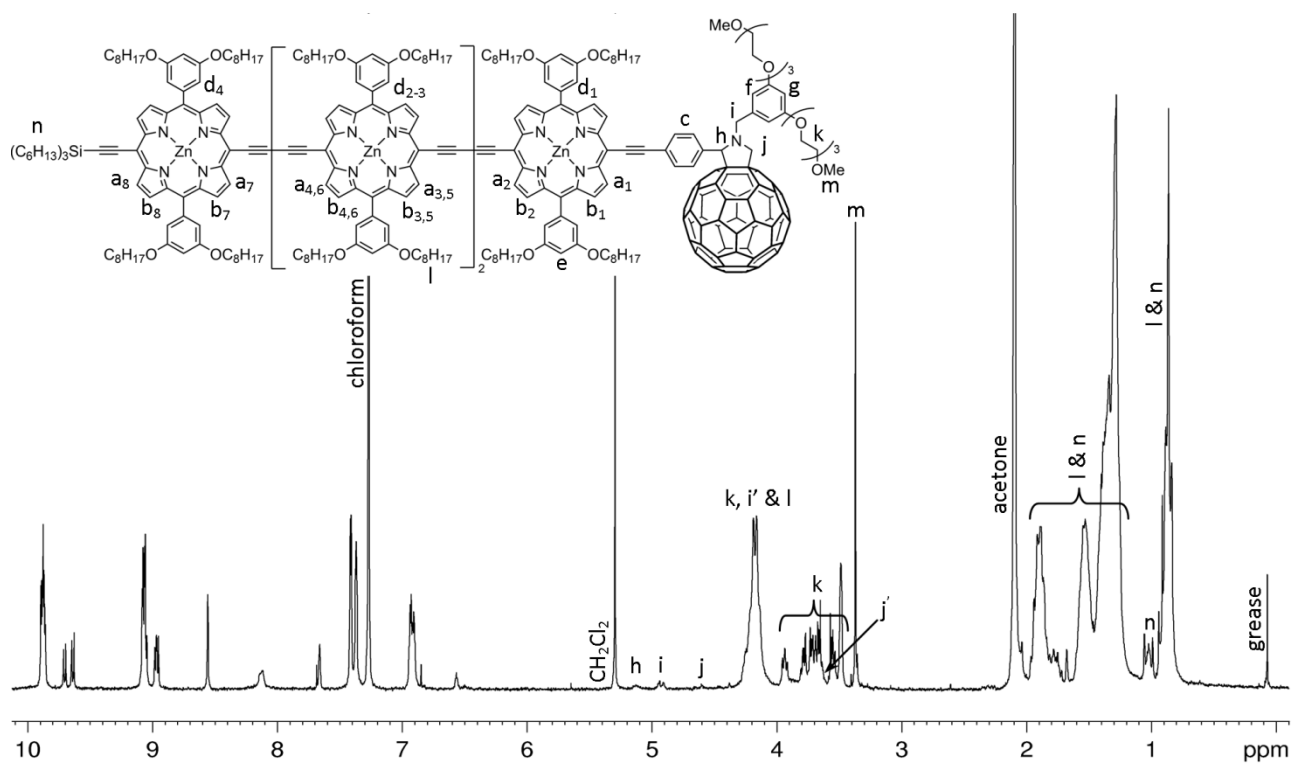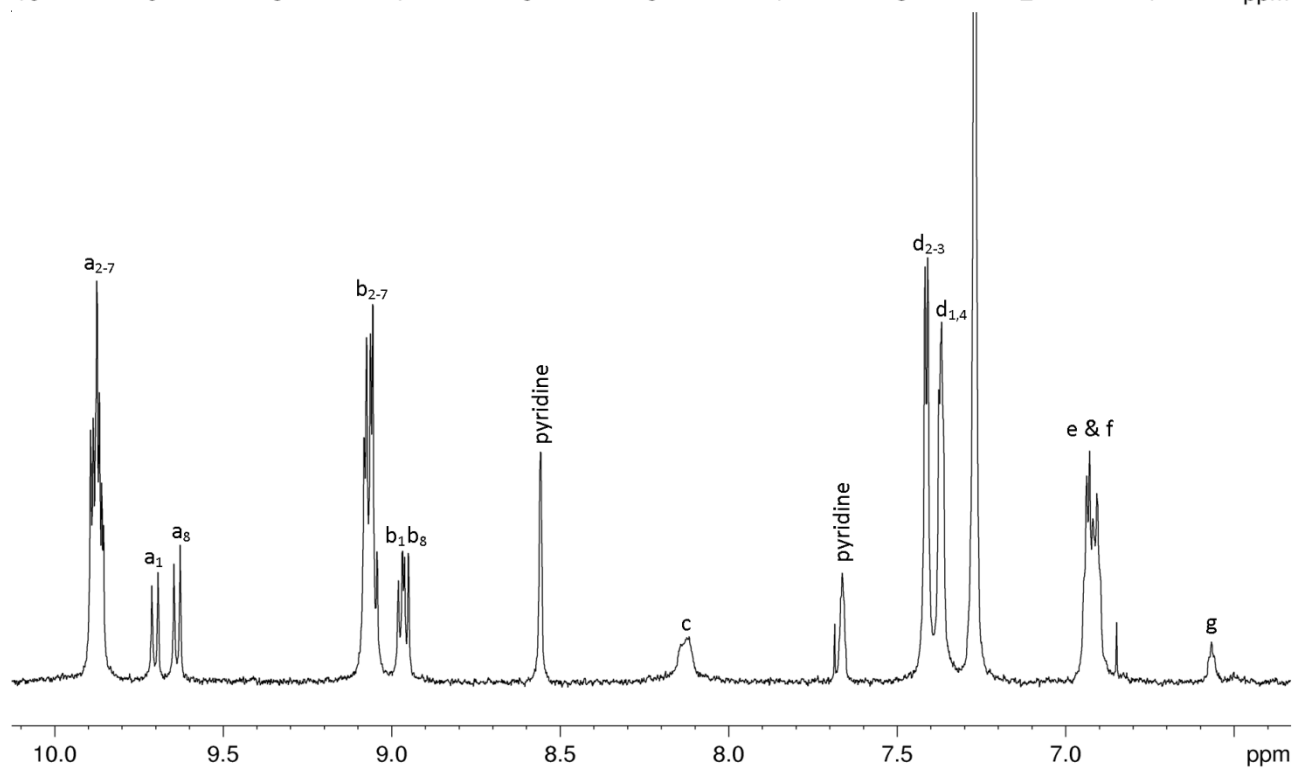

**P<sub>6</sub>-C<sub>60</sub>**; <sup>1</sup>H NMR (400 MHz, CDCl<sub>3</sub>/1 % C<sub>5</sub>H<sub>5</sub>N)

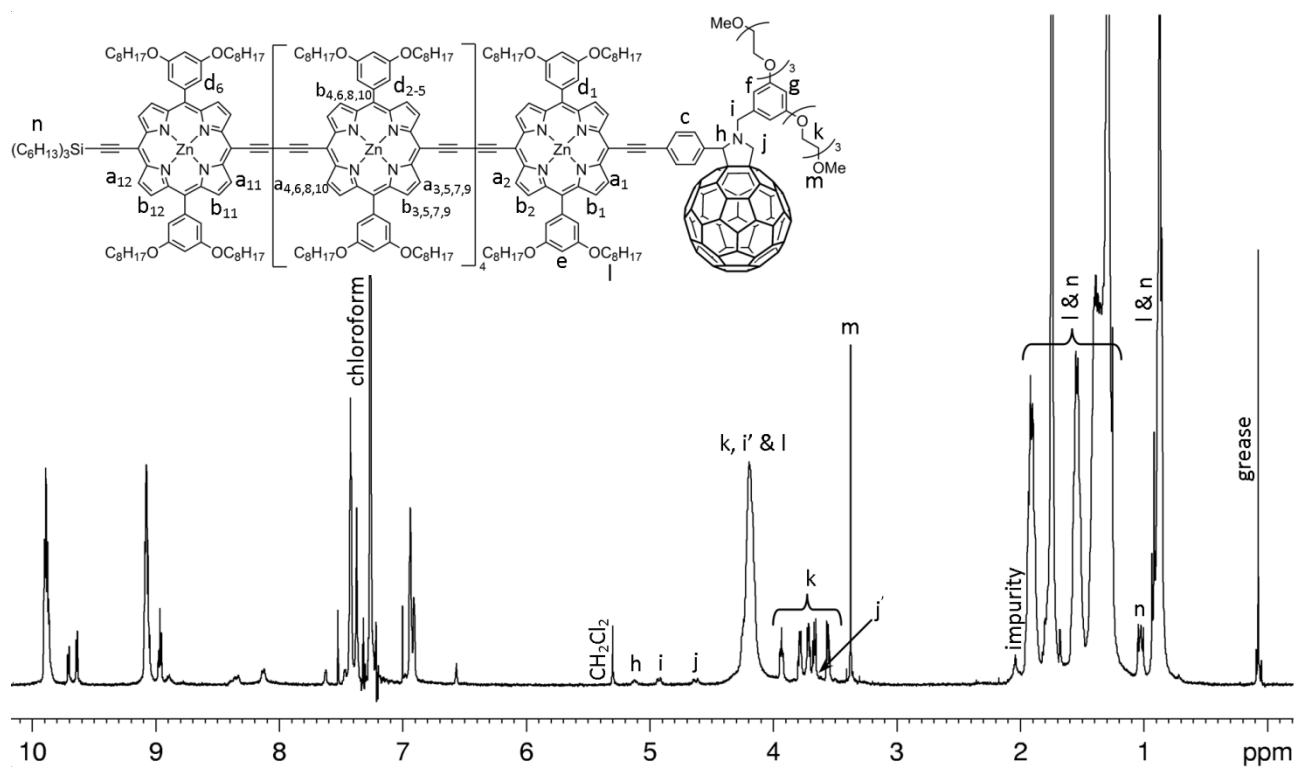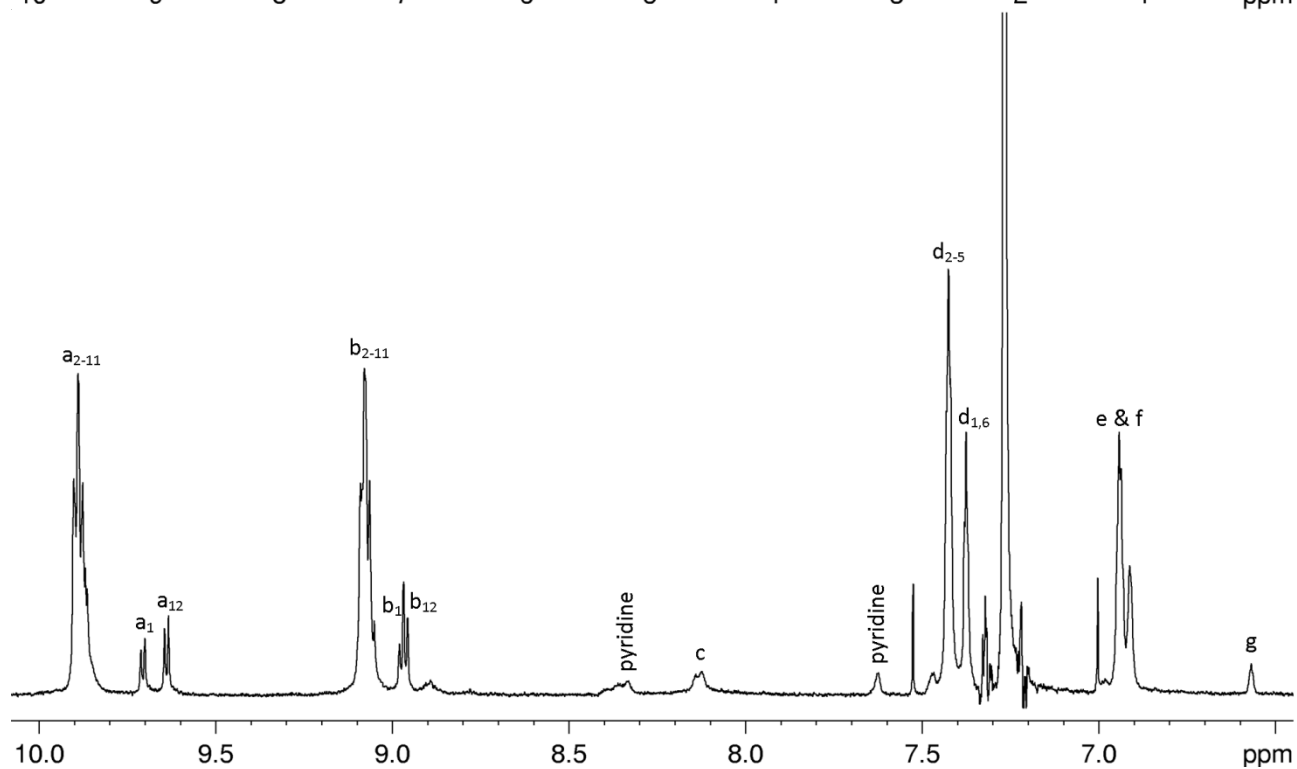

## Section S4: Mass Spectra

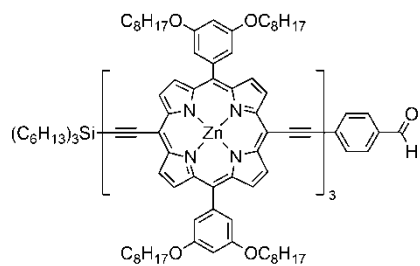

**P<sub>3</sub>-CHO:**

Matrix: DCTB

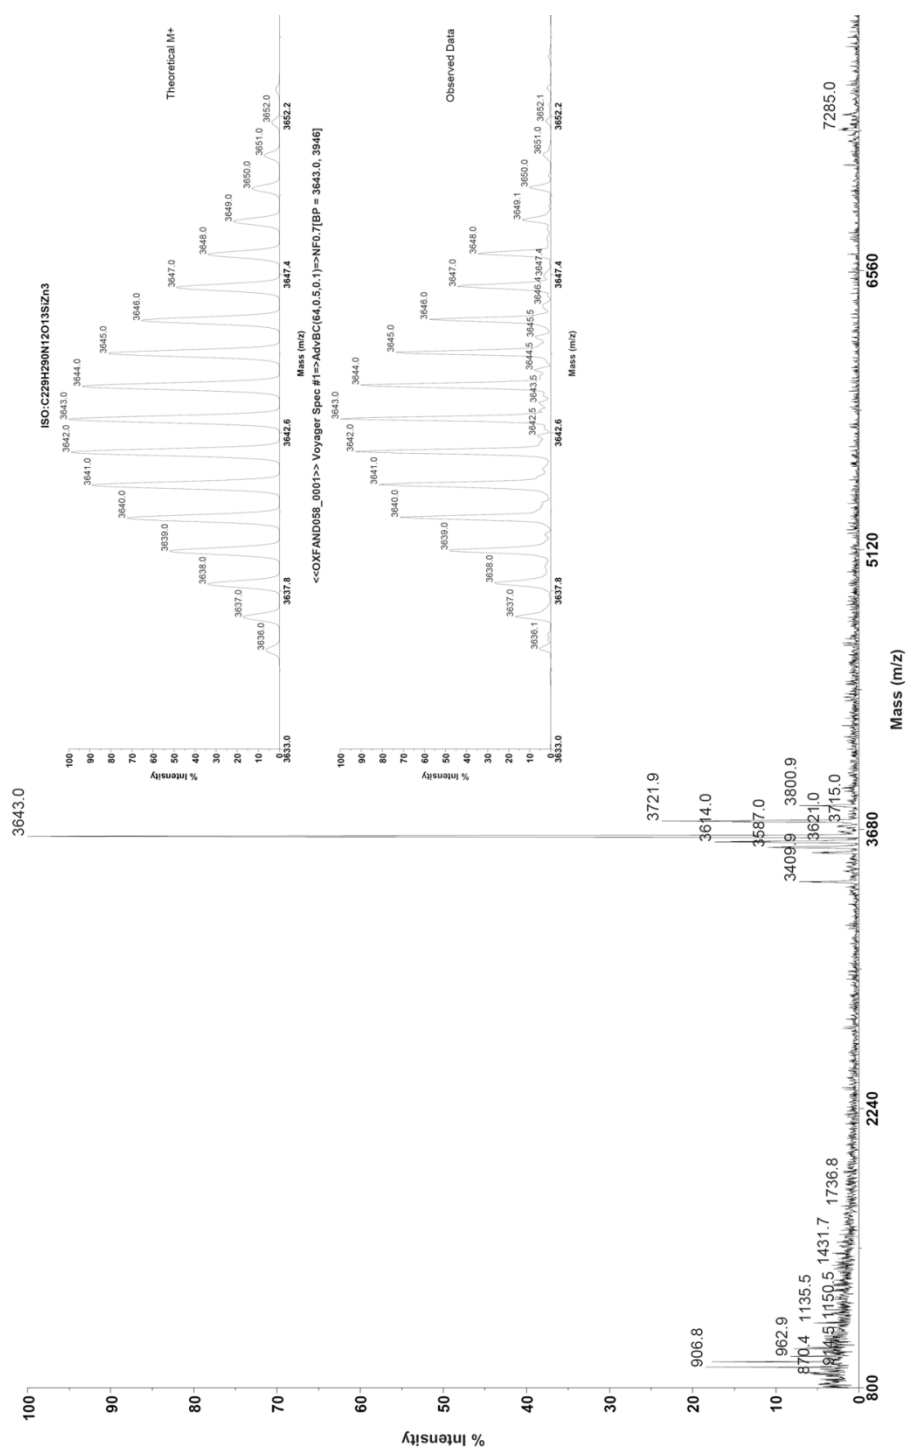



**P<sub>4</sub>-C<sub>60</sub>:**

Matrix: DCTB

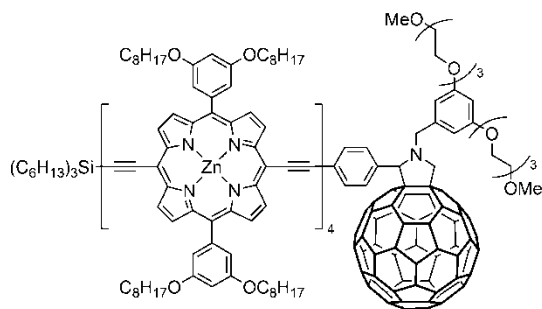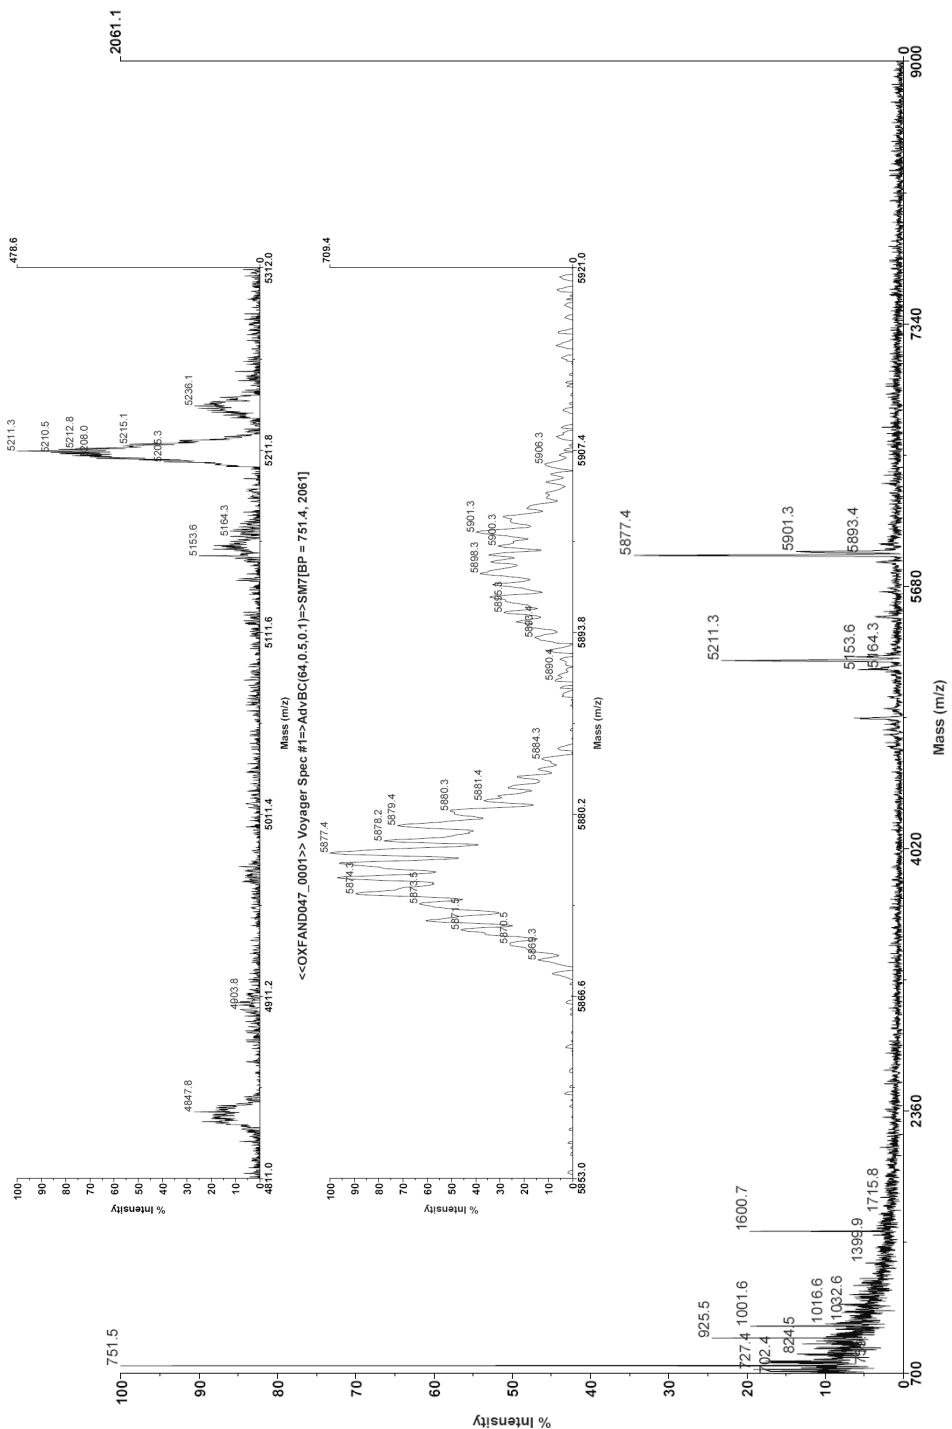

Printed: 13:36, October 21, 2008

Acquired: 13:02:00, October 21, 2008



**Section S5: HPLC traces**

The HPLC purification of compounds **P3-C60**, **P4-C60** and **P6-C60** was performed using a flow rate of 4 mL/min with the following method:

| Time (min) | % Toluene (with 1% pyridine) | % THF |
|------------|------------------------------|-------|
| 0          | 80                           | 20    |
| 8          | 65                           | 35    |
| 9          | 35                           | 65    |
| 10         | 80                           | 20    |
| 14         | 80                           | 20    |

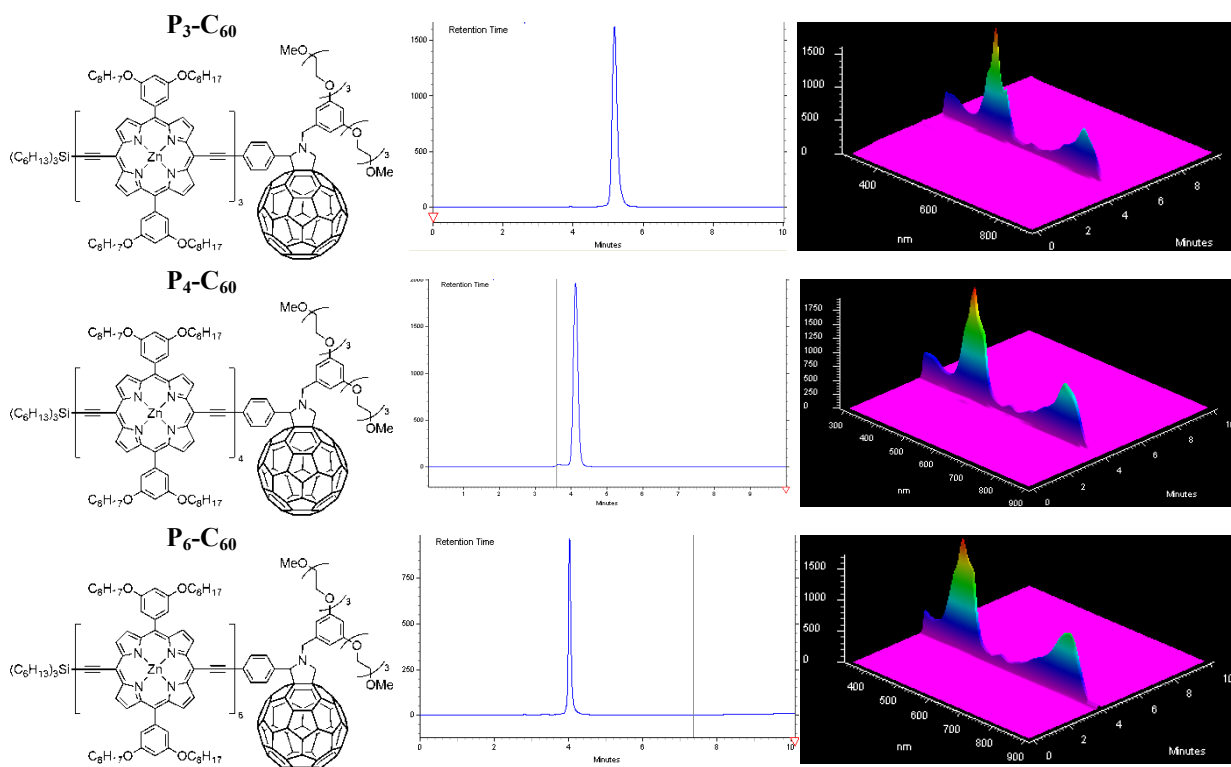

Section S6: UV/vis absorption spectra of the oligoporphyrin-fullerene compounds at different temperatures

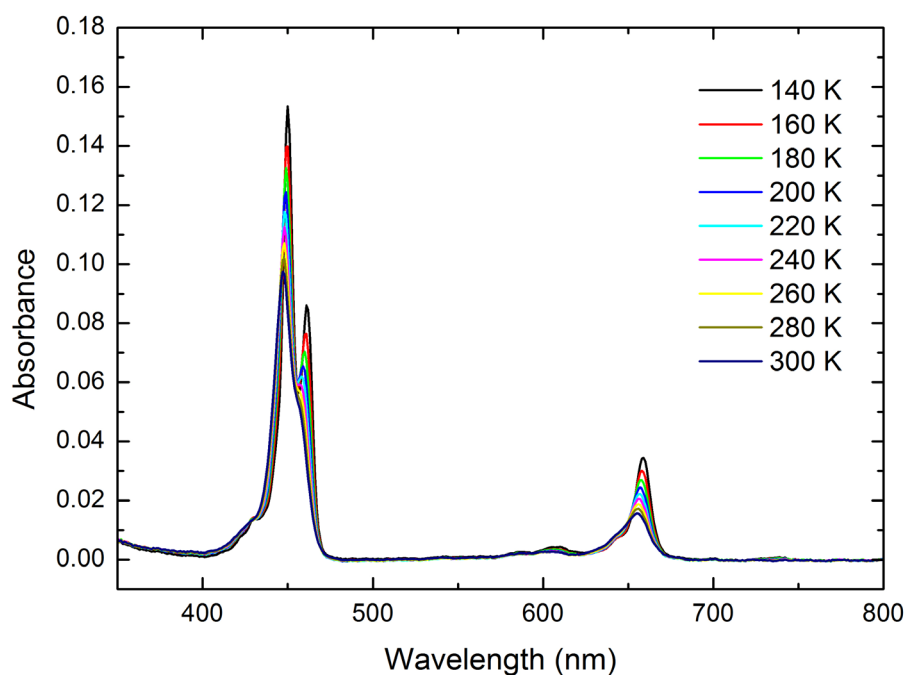

**Figure S6.1.** Ground state absorption of P<sub>1</sub>-C<sub>60</sub> in 2MTHF + 1% pyridine at different temperatures.

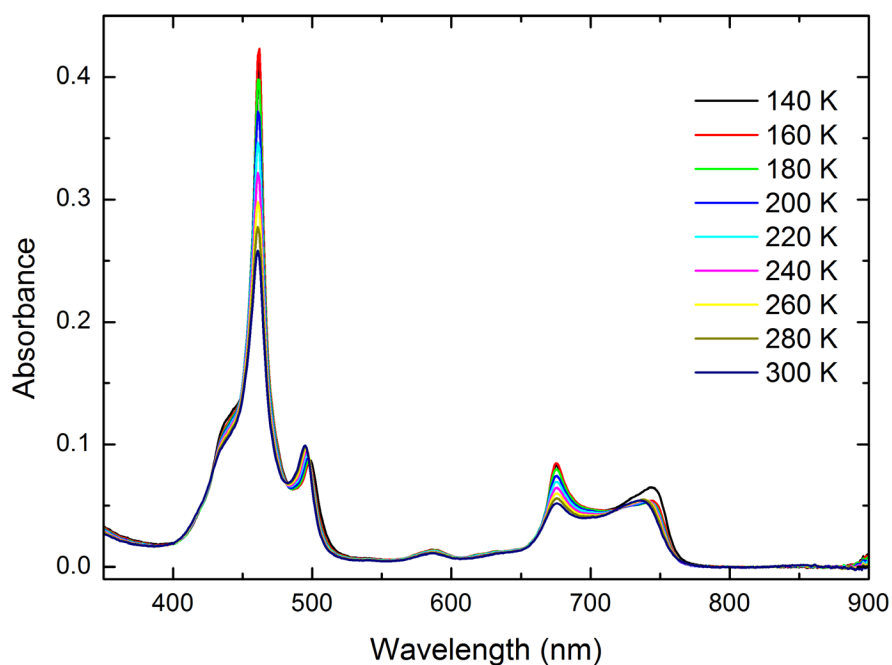

**Figure S6.2.** Ground state absorption of P<sub>2</sub>-C<sub>60</sub> in 2MTHF + 1% pyridine at different temperatures.

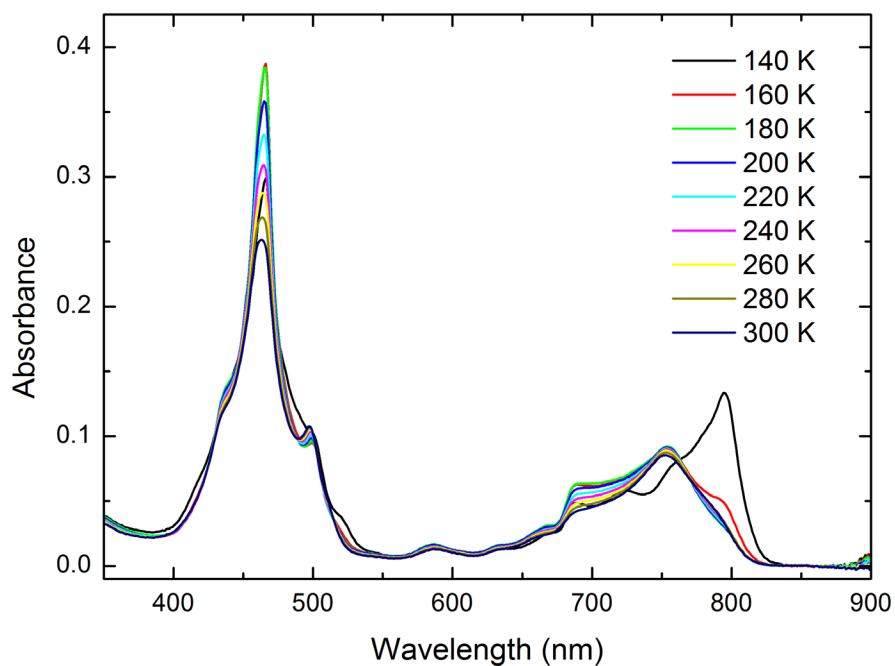

**Figure S6.3.** Ground state absorption of  $P_3-C_{60}$  in 2MTHF + 1% pyridine at different temperatures.

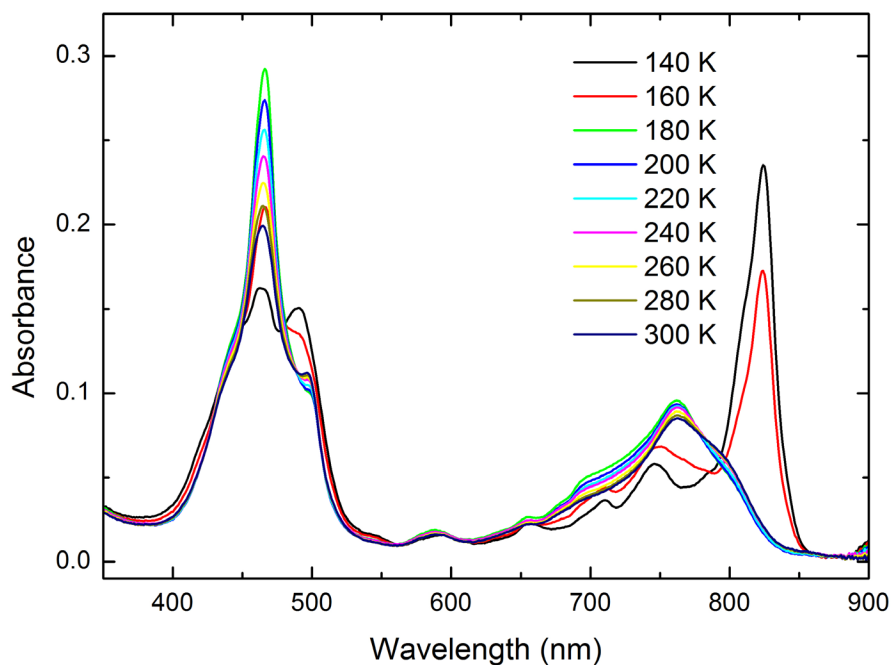

**Figure S6.4.** Ground state absorption of  $P_4-C_{60}$  in 2MTHF + 1% pyridine at different temperatures.

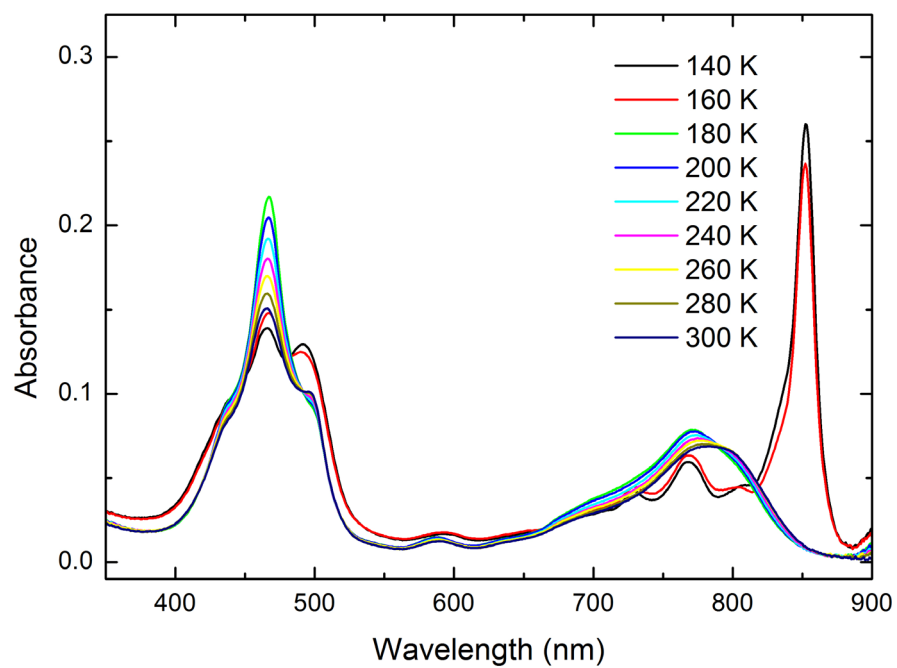

**Figure S6.5.** Ground state absorption of  $P_6-C_{60}$  in 2MTHF + 1% pyridine at different temperatures.

*Section S7:* Fluorescence spectra of the oligoporphyrin-fullerene compounds at different temperatures

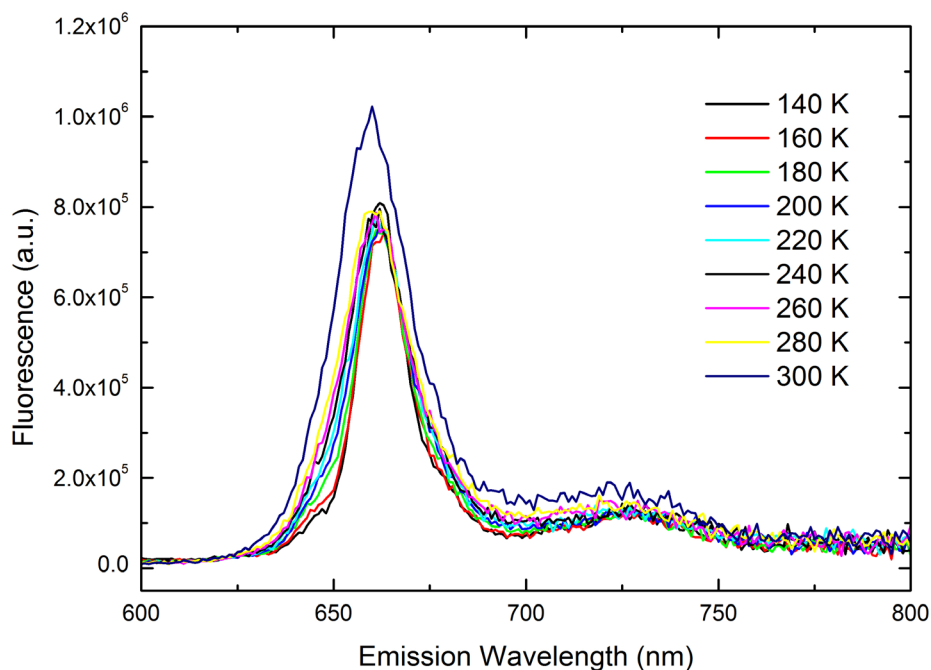

**Figure S7.1.** Steady state emission of P<sub>1</sub>-C<sub>60</sub> in 2MTHF + 1% pyridine at different temperatures excited at 450 nm.

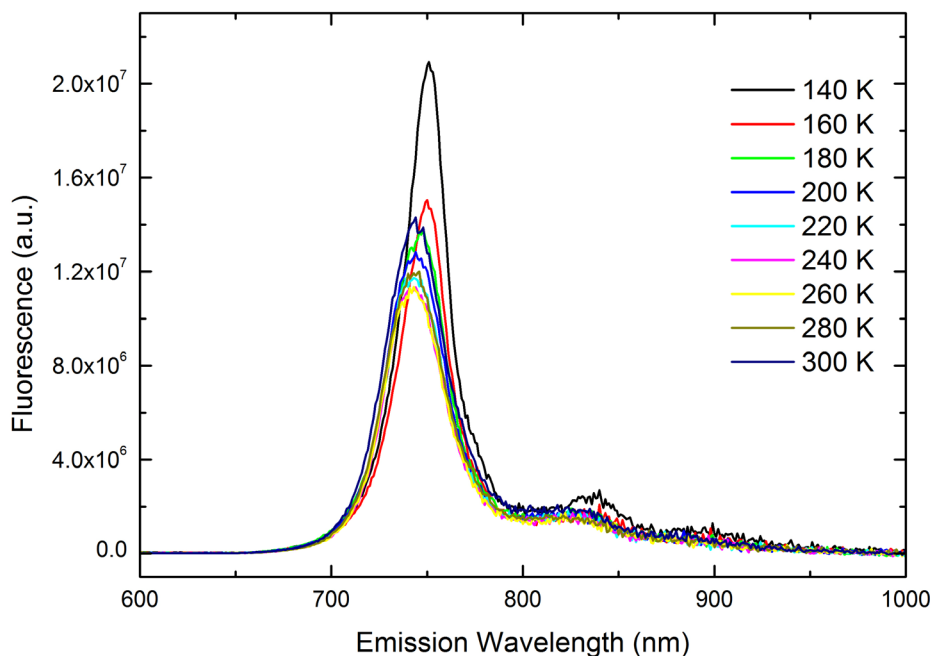

**Figure S7.2.** Steady state emission of P<sub>2</sub>-C<sub>60</sub> in 2MTHF + 1% pyridine at different temperatures, excited at 495 nm.

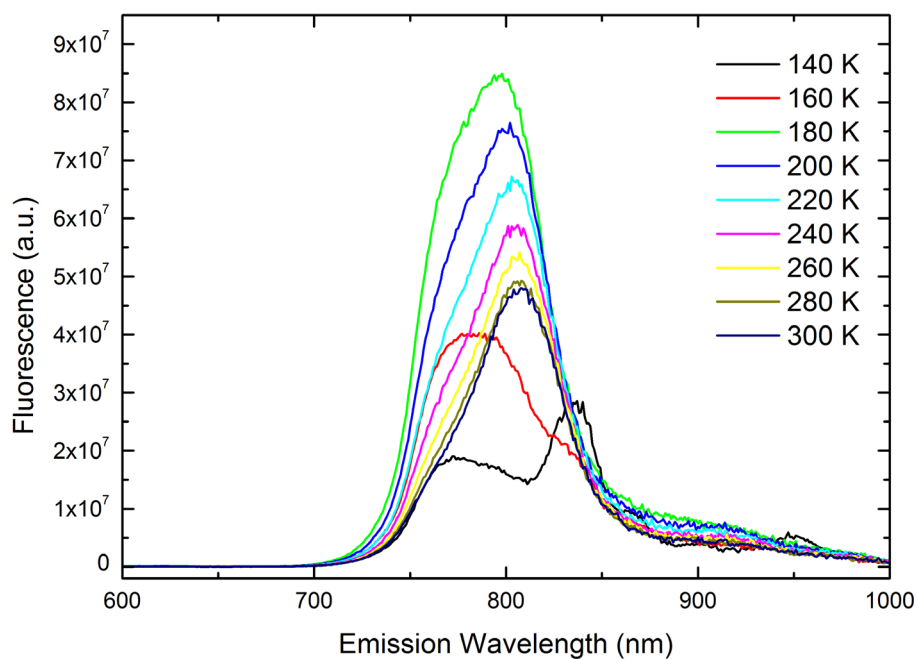

**Figure S7.3.** Steady state emission of **P<sub>4</sub>-C<sub>60</sub>** in 2MTHF + 1% pyridine at different temperatures excited at 495 nm.

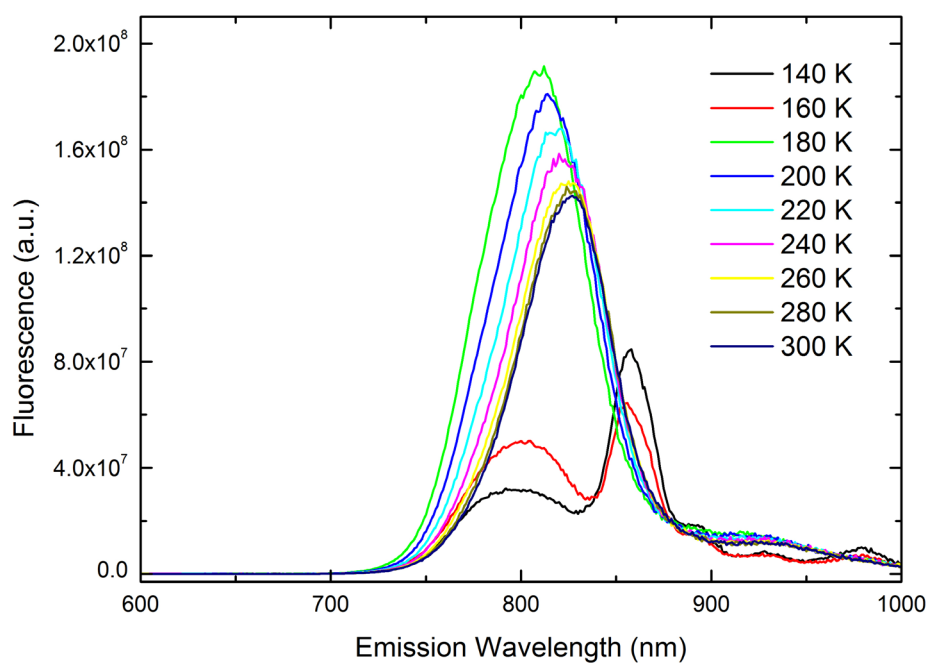

**Figure S7.4.** Steady state emission of **P<sub>6</sub>-C<sub>60</sub>** in 2MTHF + 1% pyridine at different temperatures excited at 495 nm.

*Section S8:* Fluorescence time profiles of the oligoporphyrin-fullerene compounds at different temperatures

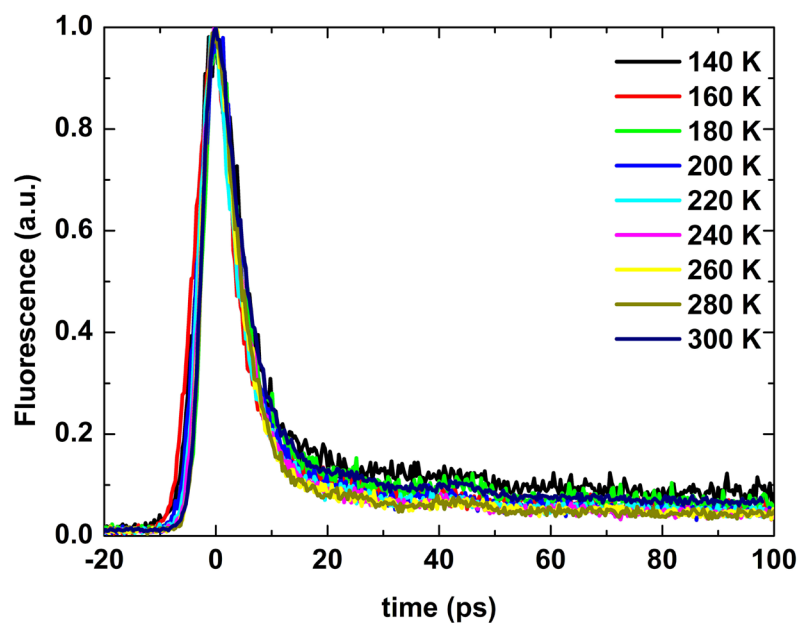

**Figure S8.1.** Fluorescence time profiles for  $P_1-C_{60}$  in 2MTHF + 1% pyridine at different temperatures.

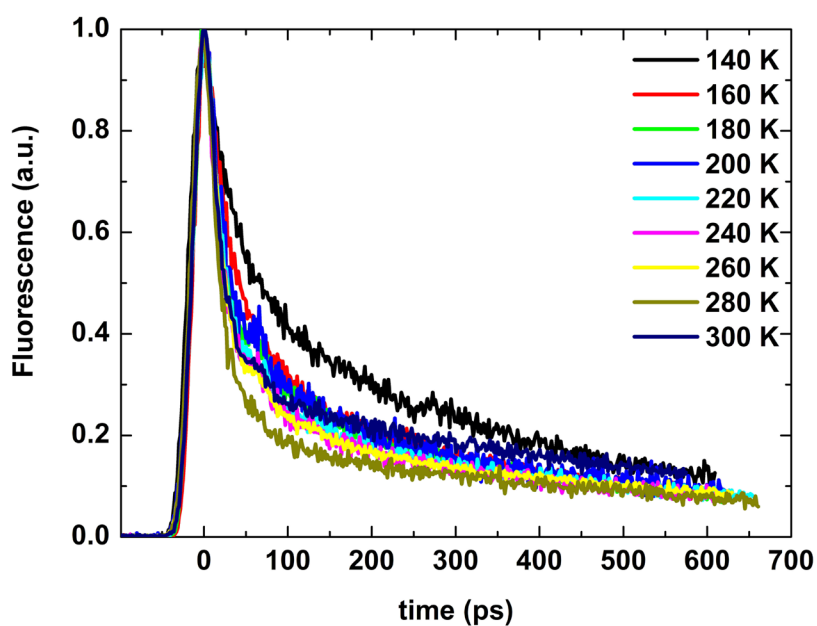

**Figure S8.2.** Fluorescence time profiles for  $P_2-C_{60}$  in 2MTHF + 1% pyridine at different temperatures.

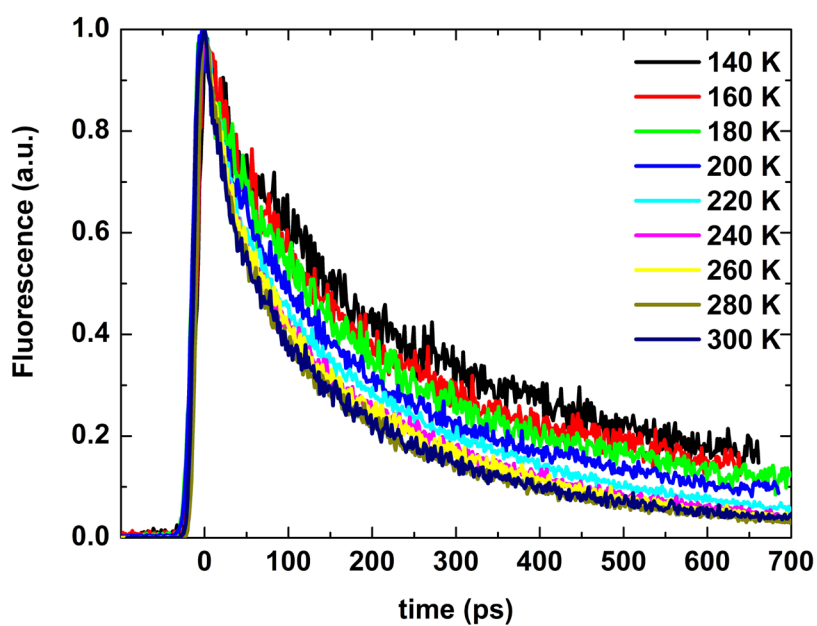

**Figure S8.3.** Fluorescence time profiles for P<sub>4</sub>-C<sub>60</sub> in 2MTHF + 1% pyridine at different temperatures.

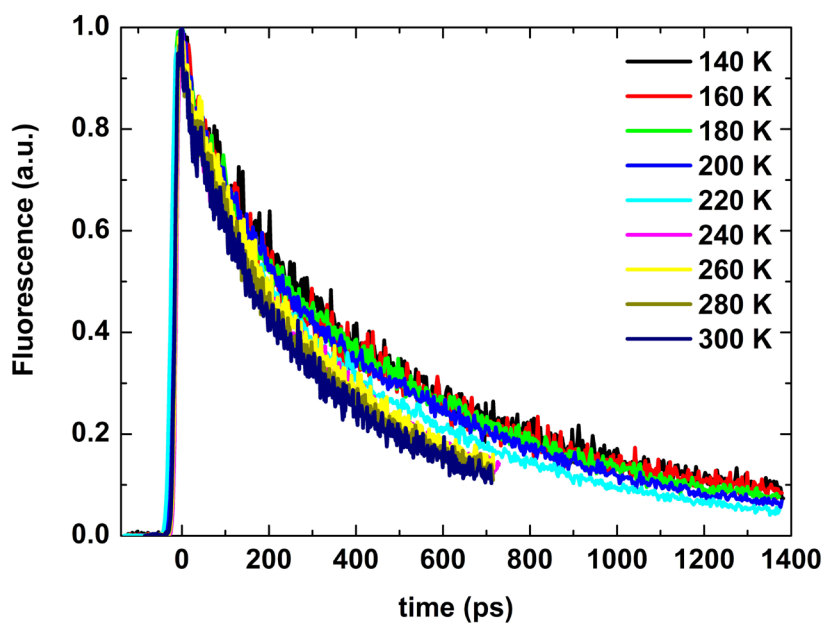

**Figure S8.4.** Fluorescence time profiles for P<sub>6</sub>-C<sub>60</sub> in 2MTHF + 1% pyridine at different temperatures.



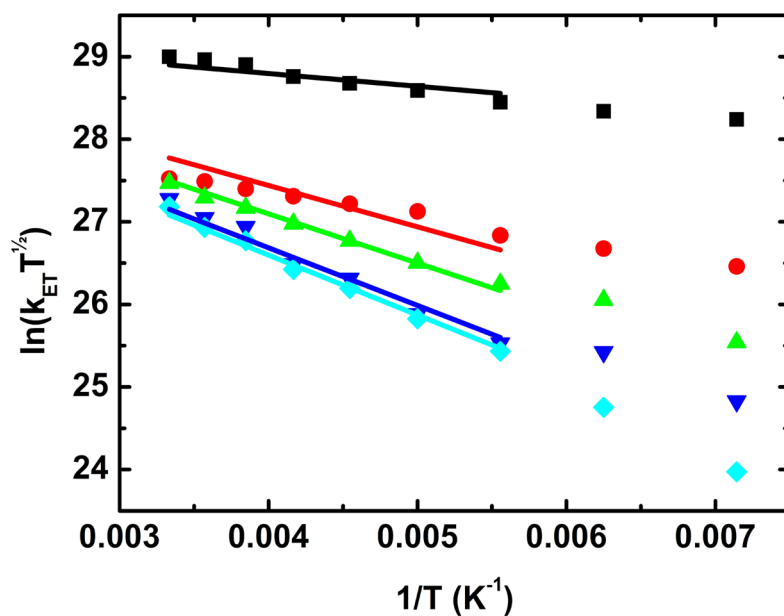

**Figure S8.5.** Rate constants for charge separation plotted against  $1/T$  ( $\mathbf{P}_1\text{-C}_{60}$  (black),  $\mathbf{P}_2\text{-C}_{60}$  (red),  $\mathbf{P}_3\text{-C}_{60}$  (green),  $\mathbf{P}_4\text{-C}_{60}$  (blue) and  $\mathbf{P}_6\text{-C}_{60}$  (cyan)). The lines are the global fit to the linearized form of Eq.2 assuming a global matrix coupling element  $V$ .

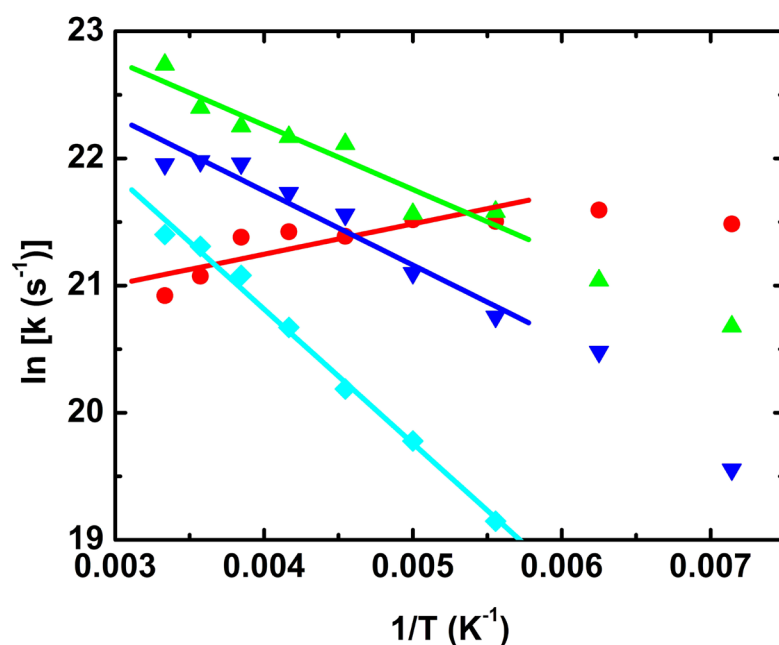

**Figure S8.6.** Rate constants for excitation energy migration plotted against  $1/T$ ,  $\mathbf{P}_2\text{-C}_{60}$  (red),  $\mathbf{P}_3\text{-C}_{60}$  (green),  $\mathbf{P}_4\text{-C}_{60}$  (blue) and  $\mathbf{P}_6\text{-C}_{60}$  (cyan)). The activation energies estimated from the slopes are:  $\mathbf{P}_3\text{-C}_{60} = 1.01$  kcal/mol,  $\mathbf{P}_4\text{-C}_{60} = 1.16$  kcal/mol and  $\mathbf{P}_6\text{-C}_{60} = 2.11$  kcal/mol.

**Table 8.1.** Temperature dependence of the fitted lifetimes for  $P_2-C_{60}$ ,  $P_3-C_{60}$ ,  $P_4-C_{60}$ , and  $P_6-C_{60}$  excited at 495 nm, including the normalized pre-exponential factors.

| T / K | $P_2-C_{60}$ |               |            |               | $P_3-C_{60}$ |               |            |               |
|-------|--------------|---------------|------------|---------------|--------------|---------------|------------|---------------|
|       | $\alpha_1$   | $\tau_1$ / ps | $\alpha_2$ | $\tau_2$ / ps | $\alpha_1$   | $\tau_1$ / ps | $\alpha_2$ | $\tau_2$ / ps |
| 140   | 0.59         | 37            | 0.41       | 337           | 0.47         | 88            | 0.53       | 536           |
| 160   | 0.71         | 32            | 0.29       | 311           | 0.54         | 58            | 0.46       | 438           |
| 180   | 0.74         | 29            | 0.26       | 332           | 0.60         | 51            | 0.40       | 306           |
| 200   | 0.76         | 23            | 0.24       | 329           | 0.68         | 42            | 0.32       | 310           |
| 220   | 0.80         | 22            | 0.20       | 361           | 0.62         | 35            | 0.38       | 203           |
| 240   | 0.81         | 21            | 0.18       | 352           | 0.63         | 29            | 0.37       | 194           |
| 260   | 0.83         | 20            | 0.17       | 363           | 0.66         | 25            | 0.34       | 181           |
| 280   | 0.88         | 19            | 0.12       | 445           | 0.68         | 23            | 0.32       | 160           |
| 300   | 0.81         | 19            | 0.19       | 489           | 0.69         | 20            | 0.30       | 119           |

| T / K | $P_4-C_{60}$ |               |            |               | $P_6-C_{60}$ |               |            |               |
|-------|--------------|---------------|------------|---------------|--------------|---------------|------------|---------------|
|       | $\alpha_1$   | $\tau_1$ / ps | $\alpha_2$ | $\tau_2$ / ps | $\alpha_1$   | $\tau_1$ / ps | $\alpha_2$ | $\tau_2$ / ps |
| 140   | 0.59         | 158           | 0.41       | 660           | 0.43         | 269           | 0.57       | 707           |
| 160   | 0.57         | 101           | 0.43       | 503           | 0.37         | 167           | 0.63       | 650           |
| 180   | 0.56         | 97            | 0.44       | 447           | 0.29         | 102           | 0.71       | 573           |
| 200   | 0.54         | 74            | 0.46       | 376           | 0.28         | 76            | 0.72       | 519           |
| 220   | 0.47         | 52            | 0.53       | 285           | 0.34         | 57            | 0.66       | 471           |
| 240   | 0.49         | 46            | 0.51       | 254           | 0.25         | 48            | 0.75       | 402           |
| 260   | 0.45         | 31            | 0.55       | 215           | 0.22         | 36            | 0.78       | 337           |
| 280   | 0.51         | 29            | 0.49       | 212           | 0.26         | 32            | 0.74       | 300           |
| 300   | 0.52         | 24            | 0.48       | 216           | 0.23         | 26            | 0.77       | 285           |

Section S9: Tables of the fitting parameters of the time absorption profiles of the oligoporphyrin-fullerene compounds at different temperatures

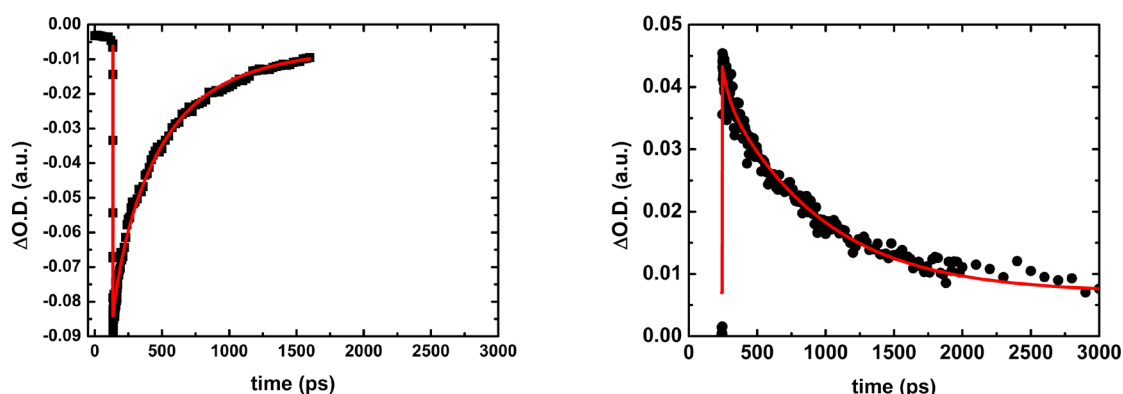

**Figure S9.1.** Time absorption profiles of  $P_4-C_{60}$  at 220 K. **Left:** Time absorption profile at 730 nm showing the recovery of the Q-band absorption. **Right:** Transient absorption decay at 1015 nm where the  $C_{60}^{\cdot-}$  and  $P_4^{+\cdot}$  species dominate the absorption. The red solid lines show typical fits using the parameters stated in tables 8.4a and 8.4b.

**Table S9.1.** Fitting parameter for the transient absorption time profiles for  $P_1-C_{60}$  taken at 650 nm representing recovery of the Q-band bleaching.

| T / K | $\alpha_1$ | $\tau_1 / ps$ | $\alpha_2$ | $\tau_2 / ps$ | $I_0$    |
|-------|------------|---------------|------------|---------------|----------|
| 140   | -0.04681   | 6.4           | -0.03306   | 455           | -0.03113 |
| 160   | -0.00716   | 6.2           | -0.00750   | 349           | -0.00204 |
| 180   | -0.00510   | 5.9           | -0.00632   | 309           | -0.00155 |
| 200   | -0.02348   | 5.4           | -0.03191   | 274           | -0.01371 |
| 220   | -0.02646   | 5.2           | -0.03316   | 226           | -0.01363 |
| 240   | -0.00723   | 5.0           | -0.01295   | 208           | -0.00307 |
| 260   | -0.01760   | 4.5           | -0.03571   | 201           | -0.01912 |
| 280   | -0.00901   | 4.4           | -0.01636   | 191           | -0.00969 |
| 300   | -0.00452   | 4.4           | -0.02172   | 189           | -0.01213 |

**Table S9.2a.** Fitting parameter for the transient absorption time profiles for  $\text{P}_2\text{-C}_{60}$  taken at 720 nm representing recovery of the Q-band bleaching.

| T / K | $\alpha_1$ | $\tau_1$ / ps | $\alpha_2$ | $\tau_2$ / ps | $\alpha_3$ | $\tau_3$ / ps | $I_0$    |
|-------|------------|---------------|------------|---------------|------------|---------------|----------|
| 140   | -0.0077    | 37            | -0.0006    | 337           | -0.02671   | 732           | -0.00153 |
| 160   | -0.00933   | 32            | -0.00051   | 311           | -0.0434    | 692           | -0.00459 |
| 180   | -0.03533   | 29            | -0.00094   | 332           | -0.03727   | 640           | -0.00576 |
| 200   | -0.00919   | 23            | -0.00013   | 329           | -0.00516   | 584           | -0.00021 |
| 220   | -0.02531   | 22            | -0.00127   | 361           | -0.06235   | 493           | -0.00912 |
| 240   | -0.01408   | 21            | -0.00087   | 352           | -0.02113   | 454           | -0.00283 |
| 260   | -0.01205   | 20            | -0.00097   | 363           | -0.03214   | 373           | -0.0047  |
| 280   | -0.00401   | 19            | -0.00177   | 445           | -0.04834   | 290           | -0.00911 |
| 300   | -0.00306   | 19            | -0.00020   | 489           | -0.02061   | 276           | -0.0005  |

**Table S9.2b.** Fitting parameter for the transient absorption time profiles for  $\text{P}_2\text{-C}_{60}$  taken at 1015 nm.

| T / K | $\alpha_1$ | $\tau_1$ / ps | $\alpha_2$ | $\tau_2$ / ps | $\alpha_3$ | $\tau_3$ / ps | $I_0$   |
|-------|------------|---------------|------------|---------------|------------|---------------|---------|
| 140   | 0.00076    | 37            | -0.00048   | 337           | 0.00481    | 732           | 0.00067 |
| 160   | 0.00196    | 32            | -0.00092   | 311           | 0.00551    | 692           | 0.00053 |
| 180   | 0.00181    | 29            | -0.00051   | 332           | 0.00537    | 640           | 0.00016 |
| 200   | 0.00271    | 23            | -0.00024   | 329           | 0.00305    | 584           | 0.00043 |
| 220   | 0.00159    | 22            | -0.00032   | 361           | 0.00371    | 493           | 0.00058 |
| 240   | 0.00212    | 21            | -0.00012   | 352           | 0.00321    | 454           | 0.00032 |
| 260   | 0.00102    | 20            | -0.00071   | 363           | 0.00416    | 373           | 0.00010 |
| 280   | 0.00212    | 19            | -0.00097   | 445           | 0.00558    | 290           | 0.00059 |
| 300   | 0.00108    | 19            | -0.00031   | 489           | 0.00449    | 276           | 0.00071 |

**Table S9.3a.** Fitting parameter for the transient absorption time profiles for **P<sub>3</sub>-C<sub>60</sub>** taken at 730 nm representing recovery of the Q-band bleaching.

| T / K | $\alpha_1$ | $\tau_1$ / ps | $\alpha_2$ | $\tau_2$ / ps | $\alpha_3$ | $\tau_3$ / ps | $I_0$    |
|-------|------------|---------------|------------|---------------|------------|---------------|----------|
| 140   | -0.0043    | 88            | -0.01373   | 536           | -0.00066   | 904           | -0.012   |
| 160   | -0.01715   | 58            | -0.01073   | 438           | -0.0105    | 794           | -0.025   |
| 180   | -0.00119   | 51            | -0.0048    | 306           | -0.06186   | 710           | -0.0216  |
| 200   | -0.02776   | 42            | -0.02335   | 310           | -0.03643   | 696           | -0.026   |
| 220   | -0.01525   | 35            | -0.01774   | 203           | -0.0529    | 627           | -0.021   |
| 240   | -0.02092   | 29            | -0.03724   | 194           | -0.0212    | 554           | -0.031   |
| 260   | -0.04388   | 25            | -0.04044   | 181           | -0.04029   | 504           | -0.027   |
| 280   | -0.00845   | 23            | -0.01275   | 160           | -0.06033   | 483           | -0.0162  |
| 300   | -0.00503   | 20            | -0.00076   | 119           | -0.08282   | 463           | -0.02571 |

**Table S9.3b.** Fitting parameter for the transient absorption time profiles for **P<sub>3</sub>-C<sub>60</sub>** taken at 1015 nm.

| T / K | $\alpha_1$ | $\tau_1$ / ps | $\alpha_2$ | $\tau_2$ / ps | $\alpha_3$ | $\tau_3$ / ps | $I_0$   |
|-------|------------|---------------|------------|---------------|------------|---------------|---------|
| 140   | 0.00105    | 88            | -0.00126   | 536           | 0.00668    | 904           | 0.0010  |
| 160   | 0.00071    | 58            | -0.00065   | 438           | 0.00455    | 794           | 0.0005  |
| 180   | 0.00088    | 51            | -0.00199   | 306           | 0.00769    | 710           | 0.0010  |
| 200   | 0.00075    | 42            | -0.00201   | 310           | 0.01161    | 696           | 0.0010  |
| 220   | 0.00038    | 35            | -0.00147   | 203           | 0.00989    | 627           | 0.00075 |
| 240   | 0.00046    | 29            | -0.00192   | 194           | 0.00952    | 554           | 0.00065 |
| 260   | 0.00266    | 25            | -0.00480   | 181           | 0.01259    | 504           | 0.00064 |
| 280   | 0.00552    | 23            | -0.00212   | 160           | 0.02051    | 483           | 0.002   |
| 300   | 0.00012    | 20            | -0.00022   | 119           | 0.00332    | 463           | 0.001   |

**Table S9.4a.** Fitting parameter for the transient absorption time profiles for **P<sub>4</sub>-C<sub>60</sub>** taken at 750 nm representing recovery of the Q-band bleaching.

| T / K | $\alpha_1$ | $\tau_1$ / ps | $\alpha_2$ | $\tau_2$ / ps | $\alpha_3$ | $\tau_3$ / ps | $I_0$   |
|-------|------------|---------------|------------|---------------|------------|---------------|---------|
| 140   | -0.0035    | 158           | -0.00122   | 660           | -0.0127    | 917           | -0.0045 |
| 160   | -0.00781   | 101           | -0.01178   | 503           | -0.00554   | 846           | -0.0079 |
| 180   | -0.01337   | 97            | -0.00181   | 447           | -0.01908   | 734           | -0.0097 |
| 200   | -0.02109   | 74            | -0.00766   | 376           | -0.03657   | 708           | -0.0050 |
| 220   | -0.00697   | 52            | -0.04257   | 285           | -0.0285    | 689           | -0.0062 |
| 240   | -0.02319   | 46            | -0.01182   | 254           | -0.02293   | 604           | -0.0019 |
| 260   | -0.02999   | 31            | -0.01972   | 215           | -0.01231   | 567           | -0.0012 |
| 280   | -0.01143   | 29            | -0.01096   | 212           | -0.01101   | 538           | -0.0017 |
| 300   | -0.00207   | 24            | -0.00319   | 216           | -0.03318   | 499           | -0.0021 |

**Table S9.4b.** Fitting parameter for the transient absorption time profiles for **P<sub>4</sub>-C<sub>60</sub>** taken at 1015 nm.

| T / K | $\alpha_1$ | $\tau_1$ / ps | $\alpha_2$ | $\tau_2$ / ps | $\alpha_3$ | $\tau_3$ / ps | $I_0$   |
|-------|------------|---------------|------------|---------------|------------|---------------|---------|
| 140   | 0.01638    | 158           | -0.00918   | 660           | 0.03414    | 917           | 0.0020  |
| 160   | 0.00902    | 101           | -0.00814   | 503           | 0.04898    | 846           | 0.0054  |
| 180   | 0.00355    | 97            | -0.00091   | 447           | 0.0354     | 734           | 0.0075  |
| 200   | 0.00293    | 74            | -0.00419   | 376           | 0.03192    | 708           | 0.0085  |
| 220   | 0.00472    | 52            | -0.00269   | 285           | 0.03421    | 689           | 0.0070  |
| 240   | 0.00142    | 46            | -0.00582   | 254           | 0.03859    | 604           | 0.0071  |
| 260   | 0.00045    | 31            | -0.00041   | 215           | 0.01273    | 567           | 0.00255 |
| 280   | 0.00034    | 29            | -0.02201   | 212           | 0.11566    | 538           | 0.01154 |
| 300   | 0.00939    | 24            | -0.04715   | 216           | 0.14728    | 499           | 0.00972 |

**Table S9.5a.** Fitting parameter for the transient absorption time profiles for **P<sub>6</sub>-C<sub>60</sub>** taken at 785 nm representing recovery of the Q-band bleaching.

| T / K | $\alpha_1$ | $\tau_1$ / ps | $\alpha_2$ | $\tau_2$ / ps | $\alpha_3$ | $\tau_3$ / ps | $I_0$   |
|-------|------------|---------------|------------|---------------|------------|---------------|---------|
| 140   | -0.00514   | 269           | -0.00245   | 707           | -0.00194   | 1112          | -0.001  |
| 160   | -0.00107   | 167           | -0.00139   | 650           | -0.00188   | 1005          | -0.003  |
| 180   | -0.00593   | 102           | -0.00724   | 573           | -0.00392   | 951           | -0.0044 |
| 200   | -0.00334   | 76            | -0.00471   | 519           | -0.00556   | 903           | -0.0035 |
| 220   | -0.00588   | 57            | -0.00651   | 471           | -0.0071    | 821           | -0.0095 |
| 240   | -0.00528   | 48            | -0.00525   | 402           | -0.00349   | 786           | -0.0165 |
| 260   | -0.00302   | 36            | -0.0032    | 337           | -0.00498   | 748           | -0.0058 |
| 280   | -0.00482   | 32            | -0.00383   | 300           | -0.00372   | 658           | -0.005  |
| 300   | -0.00177   | 26            | -0.00446   | 285           | -0.00342   | 643           | -0.0031 |

**Table S9.5b.** Fitting parameter for the transient absorption time profiles for **P<sub>6</sub>-C<sub>60</sub>** taken at 1015 nm.

| T / K | $\alpha_1$ | $\tau_1$ / ps | $\alpha_2$ | $\tau_2$ / ps | $\alpha_3$ | $\tau_3$ / ps | $I_0$   |
|-------|------------|---------------|------------|---------------|------------|---------------|---------|
| 140   | 0.00316    | 269           | 0.00075    | 707           | 0.00315    | 1112          | 0.0007  |
| 160   | 0.00621    | 167           | 0.09045    | 650           | 0.04249    | 1005          | 0.00947 |
| 180   | 0.00068    | 102           | 0.01503    | 573           | 0.00182    | 951           | 0.00191 |
| 200   | 0.00145    | 76            | 0.00618    | 519           | 0.00449    | 903           | 0.00081 |
| 220   | 0.00072    | 57            | 0.00587    | 471           | 0.0126     | 821           | 0.00108 |
| 240   | 0.00060    | 48            | 0.00334    | 402           | 0.01125    | 786           | 0.00145 |
| 260   | 0.00089    | 36            | 0.00199    | 337           | 0.01373    | 748           | 0.00108 |
| 280   | 0.00044    | 32            | 0.00141    | 300           | 0.01801    | 658           | 0.0016  |
| 300   | 0.00088    | 26            | 0.00247    | 285           | 0.0148     | 643           | 0.00177 |

## References

- (1) Winters, M. U.; Dahlstedt, E.; Blades, H. E.; Wilson, C. J.; Frampton, M. J.; Anderson, H. L.; Albinsson, B. *J. Am. Chem. Soc.* **2007**, *129*, 4291-4297.
- (2) Hoffmann, M.; Karnbratt, J.; Chang, M. H.; Herz, L. M.; Albinsson, B.; Anderson, H. L. *Angew. Chem. Int. Ed.* **2008**, *47*, 4993-4996.
- (3) Rio, Y.; Accorsi, G.; Nierengarten, H.; Rehspringer, J.-L.; Honerlage, B.; Kopitkovas, G.; Chugreev, A.; Dorsselaer, A. V.; Armaroli, N.; Nierengarten, J.-F. *New J. Chem.* **2002**, *26*, 1146-1154.
- (4) Nielsen, C. B.; Johnsen, M.; Arnbjerg, J.; Pittelkow, M.; McIlroy, S. P.; Ogilby, P. R.; Jørgensen, M. *J. Org. Chem.* **2005**, *70*, 7065-7079.
- (5) Balija, A. M.; Kohman, R. E.; Zimmerman, S. C. *Angew. Chem. Int. Ed.* **2008**, *47*, 8072-8074.
- (6) Ajamaa, F.; Figueira Duarte, T. M.; Bourgogne, C.; Holler, M.; Fowler, P. W.; Nierengarten, J.-F. *Eur. J. Org. Chem.* **2005**, *2005*, 3766-3774.
